# Supplementary material
Source: PubMed Central journal article supplement (PMC4407617)
Supplement: mmc1.pdf [file mmc1.pdf]

**Cell Reports, Volume 8**

**Supplemental Information**

## **Intrinsically Disordered Segments Affect**

## **Protein Half-Life in the Cell and during Evolution**

**Robin van der Lee, Benjamin Lang, Kai Kruse, Jörg Gsponer, Natalia Sánchez de Groot, Martijn A. Huynen, Andreas Matouschek, Monika Fuxreiter, and M. Madan Babu**

# INVENTORY OF MAIN DISPLAY AND SUPPLEMENTAL DATA

## Figure 1. The effects of terminal disordered segments on protein half-life

**Figure S1A.** Description of the yeast data used in our study

**Figure S1B.** The raw data show the non-linear relationship between the length of disordered segments and protein half-life

**Figure S1C.** The results for N-terminal disorder are independent of the average disorder scores

**Figure S1D.** The results are independent of the average disorder scores of the long N-terminal disordered segments

**Figure S1E.** C-terminal disorder lengths for proteins in different half-life groups do not differ significantly as a result of the experimental design used for half-life measurements

**Figure S1F.** Terminal disorder lengths for proteins in different half-life groups, divided along the median

**Figure S1G.** The results are independent of protein length

**Figure S1H.** The relationship between N-terminal disorder and half-life does not appear connected to the N-end rule

**Table S1A.** Compendium of datasets used in our study

**Table S1B.** Summary of boxplot parameters and significance estimates for the effects of disordered segments on protein half-life in yeast (DISOPRED2)

**Table S1C.** The results are independent of the method used to predict intrinsic protein disorder – IUPred

**Table S1D.** The results are independent of the method used to predict intrinsic protein disorder – PONDR VSL1

**Table S1E.** Disordered segments of different lengths influence protein half-life

**Table S1F.** Function enrichment analysis of proteins with long N-terminal disorder, long C-terminal disorder, and long N-terminal structure

**Table S1G.** The results are independent of protein length

**Table S1H.** The results are independent of protein abundance

**Table S1I.** The trends are not affected by cytoplasmic or nuclear localization

**Table S1J.** Removal of membrane proteins does not affect the observed trends

**Table S1K.** Using the Kolmogorov-Smirnov test to assess half-life differences yields equivalent results

**Table S2 (separate Excel file).** The primary data used in this study

## Table 1. Conditional probabilities for intrinsically disordered segments and protein half-life

**Table S3A.** Extended conditional probabilities for N-terminal disorder and protein half-life

**Table S3B.** Extended conditional probabilities for internal disorder and protein half-life

## Figure 2. The effects of internal disordered segments on protein half-life

**Figure S2A.** The results for internal disorder are independent of the average disorder scores of the proteins

**Figure S2B.** The results are independent of the average disorder scores of the internal disordered segments

**Figure S2C.** Proteins with multiple internal disordered segments generally have shorter half-lives than those with fewer

**Figure S2D.** Calculation of the minimal number of residues that may constitute an internal disordered segment that is directly cleavable by the 20S proteasome

**Table S4A.** The results for internal disorder are independent of the length of N-terminal disorder of the proteins

**Table S4B.** Function enrichment analysis of proteins with internal disordered segment(s)

## Figure S3. The effects of terminal and internal disordered segments on protein half-life are independent of the overall degree of disorder

**Figure S3A.** The overall degree of disorder correlates with the length of disordered segments

**Figure S3B.** Proteins with various combinations of disordered segments were matched by their overall degree of disorder

**Figure S3C.** The combined effects of disordered segments on protein half-life are independent of the overall degree of disorder

**Figure S3D.** Statistics for the differences between half-life distributions are comparable when assessing only proteins with similar overall disorder degree or when assessing all proteins

**Figure S3E.** Proteins with and without disordered segments were paired based on their overall degree of disorder

**Figure S3F.** The individual effects of disordered segments on protein half-life are independent of the overall degree of disorder

**Figure S3G.** The number of unique proteins in pairs with and without disordered segments

**Figure S3H.** Statistics of half-life differences of paired proteins with and without disordered segments

**Figure S3I.** Proteins with different numbers of internal disordered segments were matched by their overall degree of disorder

**Figure S3J.** The effects of multiple internal disordered segments on protein half-life are independent of the overall degree of disorder

**Figure S3K.** Statistics for the differences between half-life distributions are comparable when assessing only proteins with similar overall disorder degree or when assessing all proteins

### **Figure 3. The effects of disordered segments on protein turnover in mouse and human**

**Table S5.** Summary of boxplot parameters and significance estimates for the effects of disordered segments on protein turnover in mouse and human

### **Figure 4. Divergence in disordered segments during evolution can impact protein half-life**

**Figure S4A.** Paralogous pairs with a negative half-life change have larger divergence in the length of N-terminal disorder

**Figure S4B.** Results of the paralogous protein analysis, without paralogs resulting from the ancestral yeast whole-genome duplication

**Table S6A.** Divergence of N-terminal or internal disordered segments is linked to protein half-life changes during evolution

**Table S6B.** Approximate permutation tests for N-terminal disorder in paralog pairs

**Table S6C.** Function enrichment analysis of paralog pairs that diverged in N-terminal or internal disordered segments

**Table S7 (separate Excel file).** Data on N-terminal disordered regions, internal disordered regions, and half-life for paralog pairs

### **Table 2. Conditional probabilities for intrinsically disordered segments and protein half-life in pairs of paralogs**

**Table S8A.** Extended conditional probabilities for N-terminal disorder and protein half-life in pairs of paralogs

**Table S8B.** Extended conditional probabilities for internal disorder and protein half-life in pairs of paralogs

### **Figure 5. Concept describing the general relationship between the presence of long terminal or internal disordered segments and protein half-life**

#### **Supplemental Results**

**Results S1.** The effects of disordered segments on half-life are independent of the overall disorder degree (extended)

**Results S2.** The results are independent of known degradation signals

**Results S3.** Disordered segments of proteins with short half-life lack enriched, uncharacterized sequence motifs that could explain the rapid degradation

**Results S4.** Paralogous pairs with a negative half-life change have larger divergence in the length of N-terminal disorder

**Results S5.** The reported trends are independent of confounding factors

**Results S6.** Highly stable proteins with undetermined or outlier half-life are generally less disordered

**Results S7.** The results are independent of protein length

**Results S8.** Degradation of membrane proteins

**Results S9.** The relationship between N-terminal disorder and half-life does not appear connected to the N-end rule

#### **Supplemental Discussion**

**Discussion S1.** Proteins without disordered segments can still be degraded quickly

**Discussion S2.** Disordered segments could influence the dynamics and regulation of signaling pathways (extended)

#### **Supplemental Experimental Procedures**

#### **Supplemental References**

# SUPPLEMENTAL DATA

Figure S1

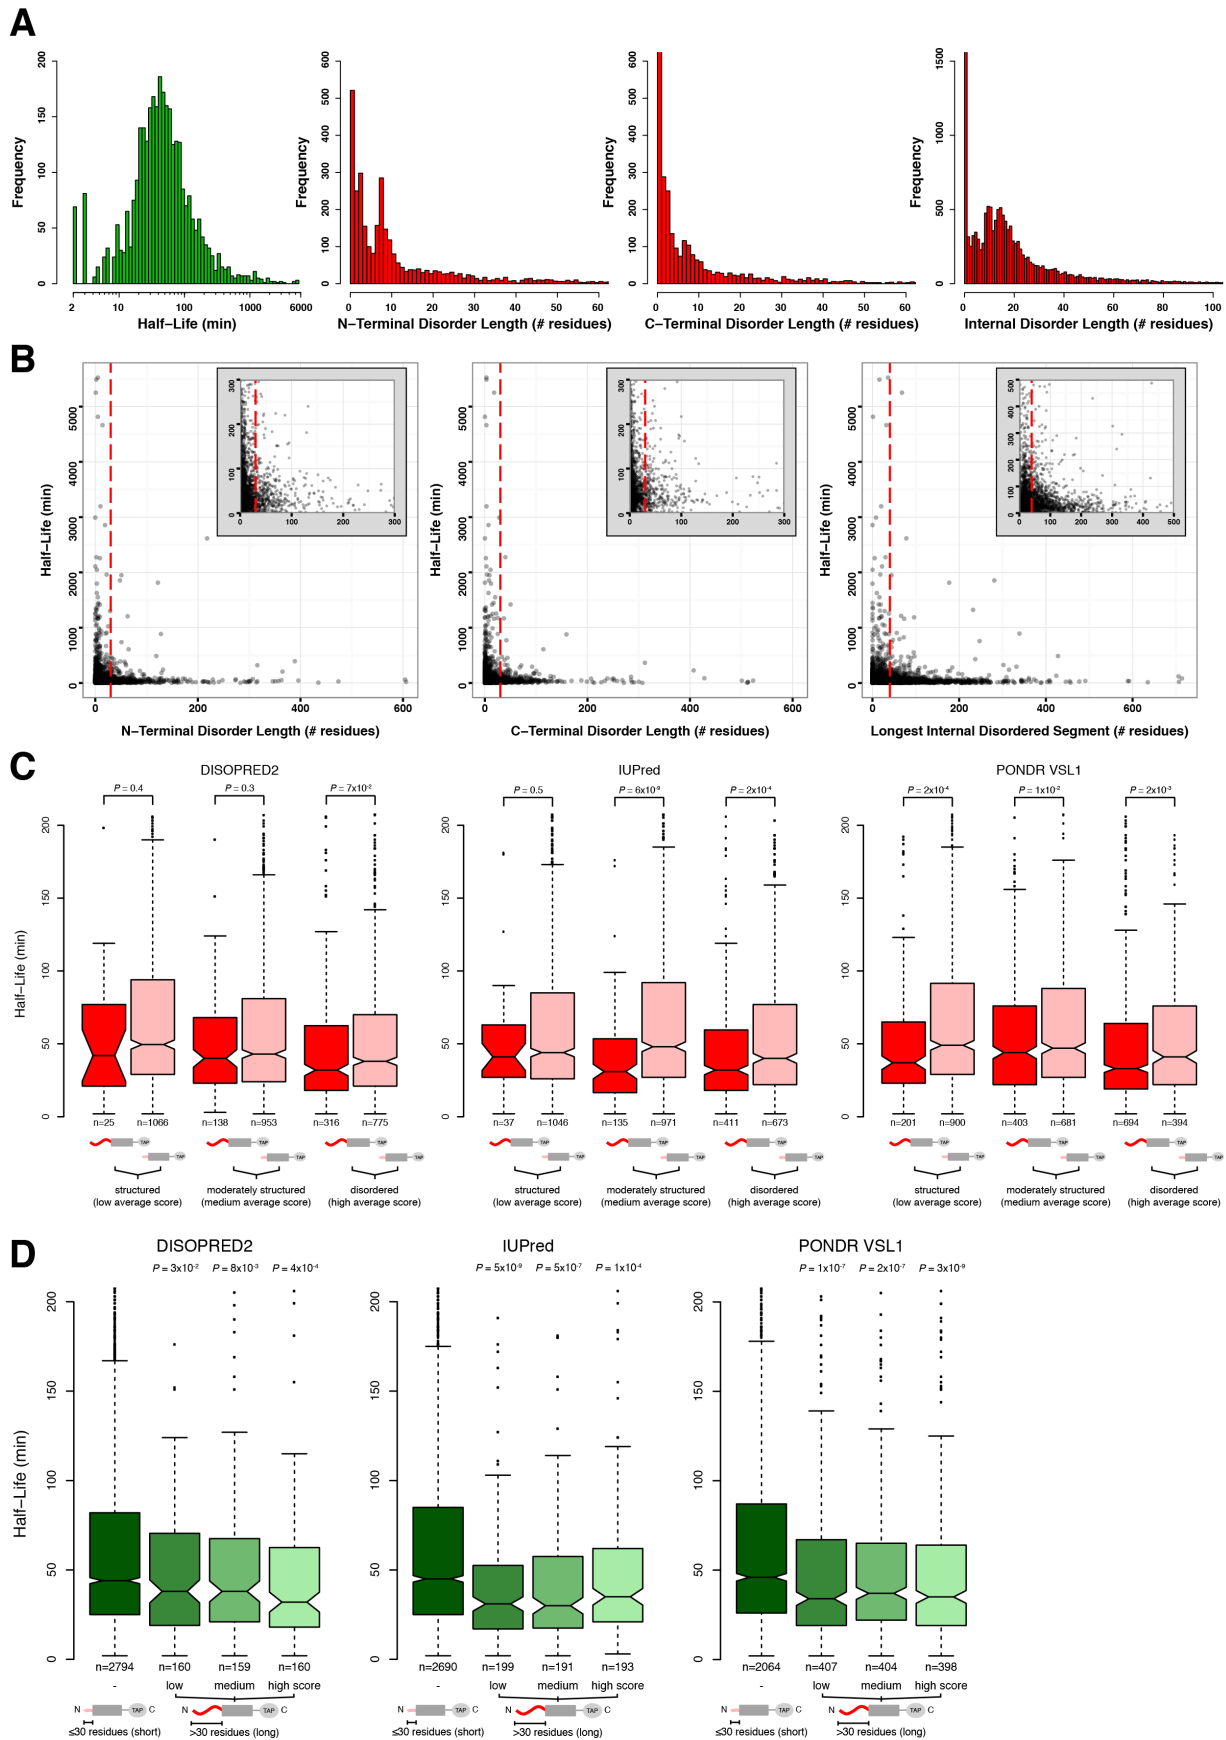

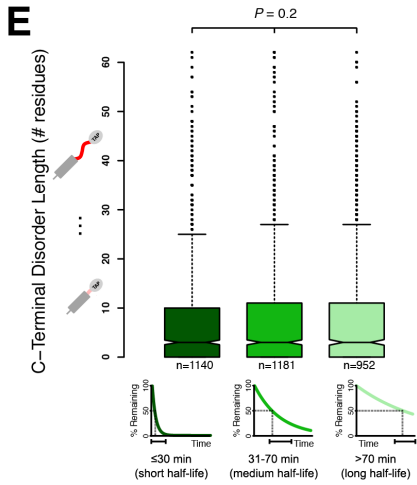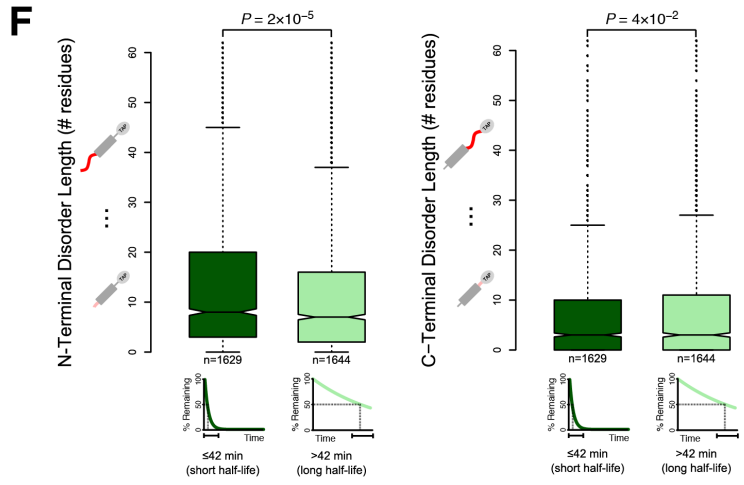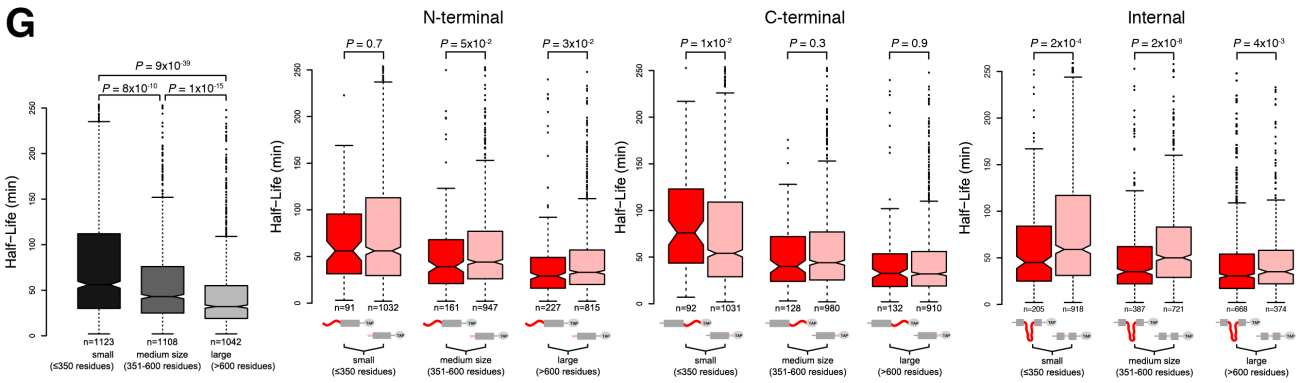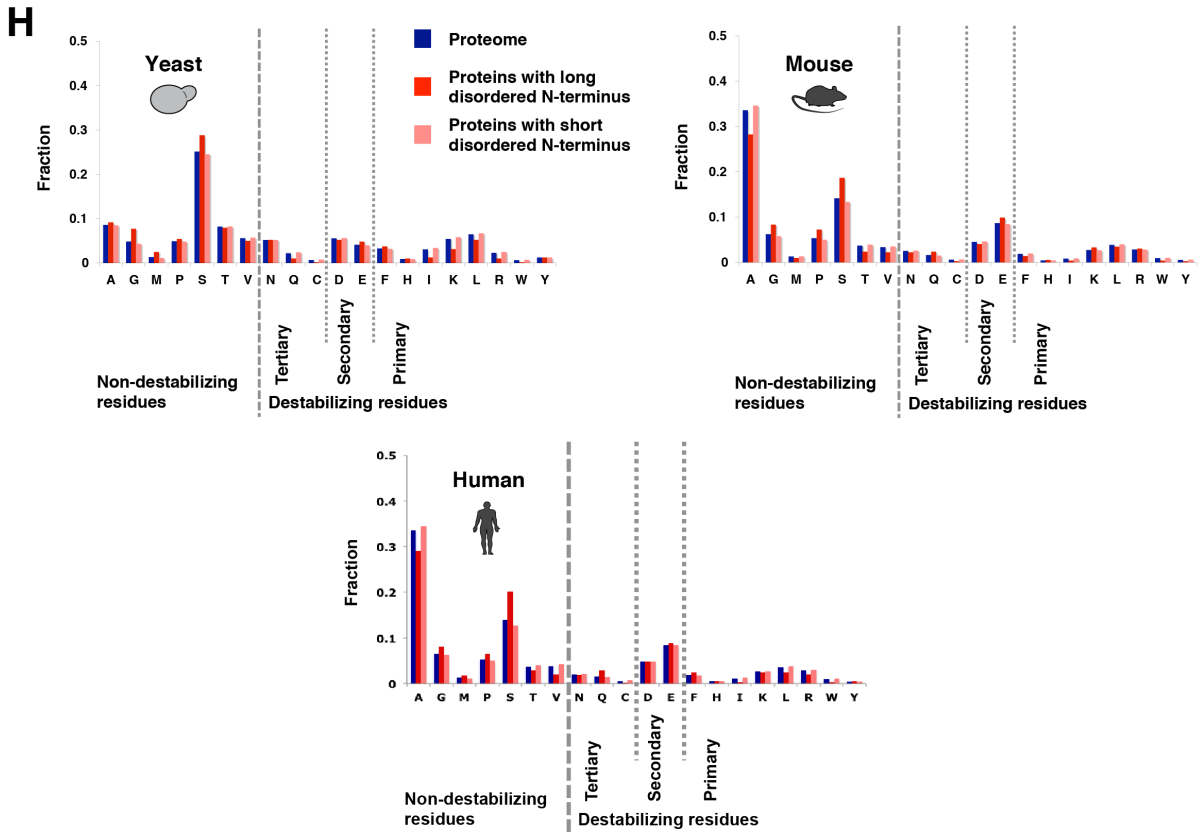

**Figure S1. Supplemental data for the effects of terminal disordered segments on protein half-life, Related to Figure 1**

Boxplots of the distribution of half-life values and lengths of disordered segments for the different groups of proteins in *S. cerevisiae*. For further information about the plot content see **Figure 1** in the main text.

**(A) Description of the yeast data used in our study**

The histograms show, from left to right, the distributions of protein half-life (log-scale), N-terminal disorder length, C-terminal disorder length, and internal disorder length. For clarity the axes were limited to 60 (N- and C-terminal disorder length) and 100 residues (internal disorder length); several longer disordered segments do occur, but only in low frequencies. Note that multiple internal disordered regions may occur in one protein, which increases the number of data points in the internal disorder panel.

**(B) The raw data show the non-linear relationship between the length of disordered segments and protein half-life**

Scatterplots of protein half-life versus N-terminal disorder length (left), C-terminal disorder length (middle), and the length of the longest internal disordered segment (right). Insets show the same plots, zoomed in on cluttered areas. Red dashed lines correspond to the cutoffs used for grouping the proteins into those with long and those with short disordered segments: 30 residues for both N- and C-terminal disorder, and 40 residues for internal disorder. In the N-terminal and C-terminal disorder plots, one data point above 600 residues in length was not shown to improve visualization. The same is true for one data point above 750 residues in length for the internal disorder plot.

**(C) The results for N-terminal disorder are independent of the average disorder scores**

Proteins were divided into tertiles according to the average disorder score for the whole protein as reported by the three disorder predictors: DISOPRED2 (left), IUPred (middle) and PONDR VSL1 (right). *P* values (Mann-Whitney *U* test) shown compare the disordered group to its non-disordered counterpart within the same score tertile.

**(D) The results are independent of the average disorder scores of the long N-terminal disordered segments**

Proteins were divided into tertiles according to the average disorder score for the long N-terminal disordered segments as reported by the three disorder predictors: DISOPRED2 (left), IUPred (middle) and PONDR VSL1 (right). The left-most boxplot in each panel (dark green) contains proteins without the disorder type of interest, i.e. proteins without a long disordered N-terminus. *P* values (Mann-Whitney *U* test) shown compare each score tertile to the non-disordered group.

**(E) C-terminal disorder lengths for proteins in different half-life groups do not differ significantly as a result of the experimental design used for half-life measurements**

The nature of the experimental design used to measure protein half-life necessarily ensured that all proteins have identical C-termini (i.e. the TAP-tag) (Belle et al., 2006). Therefore, as expected, the distributions of C-terminal disorder lengths, which were predicted based on the sequence of the untagged genomic proteins, are not significantly different ( $P = 0.2$ , Kruskal-Wallis test) between different half-life groups (indicated with exponential degradation curves; from short half-life, dark green, to long half-life, light green). Outliers with C-terminal disorder length >60 residues are not shown to improve visualization.

**(F) Terminal disorder lengths for proteins in different half-life groups, divided along the median**

Plots are shown for N-terminal disorder length (left) and C-terminal disorder length (right). Proteins were divided into two half-life groups: (i) shorter than or equal to the median ( $\leq 42$  minutes, short half-life), and (ii) longer than the median (>42 minutes, long half-life). Division of the proteins into two half-life groups, instead of three (**Figures 1E and S1E**), does not affect the conclusions. Outliers with a length of >60 residues are not shown to improve visualization.

**(G) The results are independent of protein length**

Proteins were classified based on, from left to right: overall length (i.e. size), both the length of N-terminal disorder and overall length, both the length of C-terminal disorder and overall length, and both the presence of an internal disordered segment and overall length. Outliers with half-life >250 minutes are not shown to improve visualization.

**(H) The relationship between N-terminal disorder and half-life does not appear connected to the N-end rule**

Frequency distributions of N-terminal residues next to the initiator methionines in yeast (top-left), mouse (top-right) and human (bottom) for the entire proteome (blue), proteins with a long disordered N-terminus (dark red), and proteins with a short disordered N-terminus (light red). The N-end rule defines non-destabilizing and destabilizing (primary, secondary, and tertiary) residues. See also **Supplemental Results S9**.

**Figure S2**

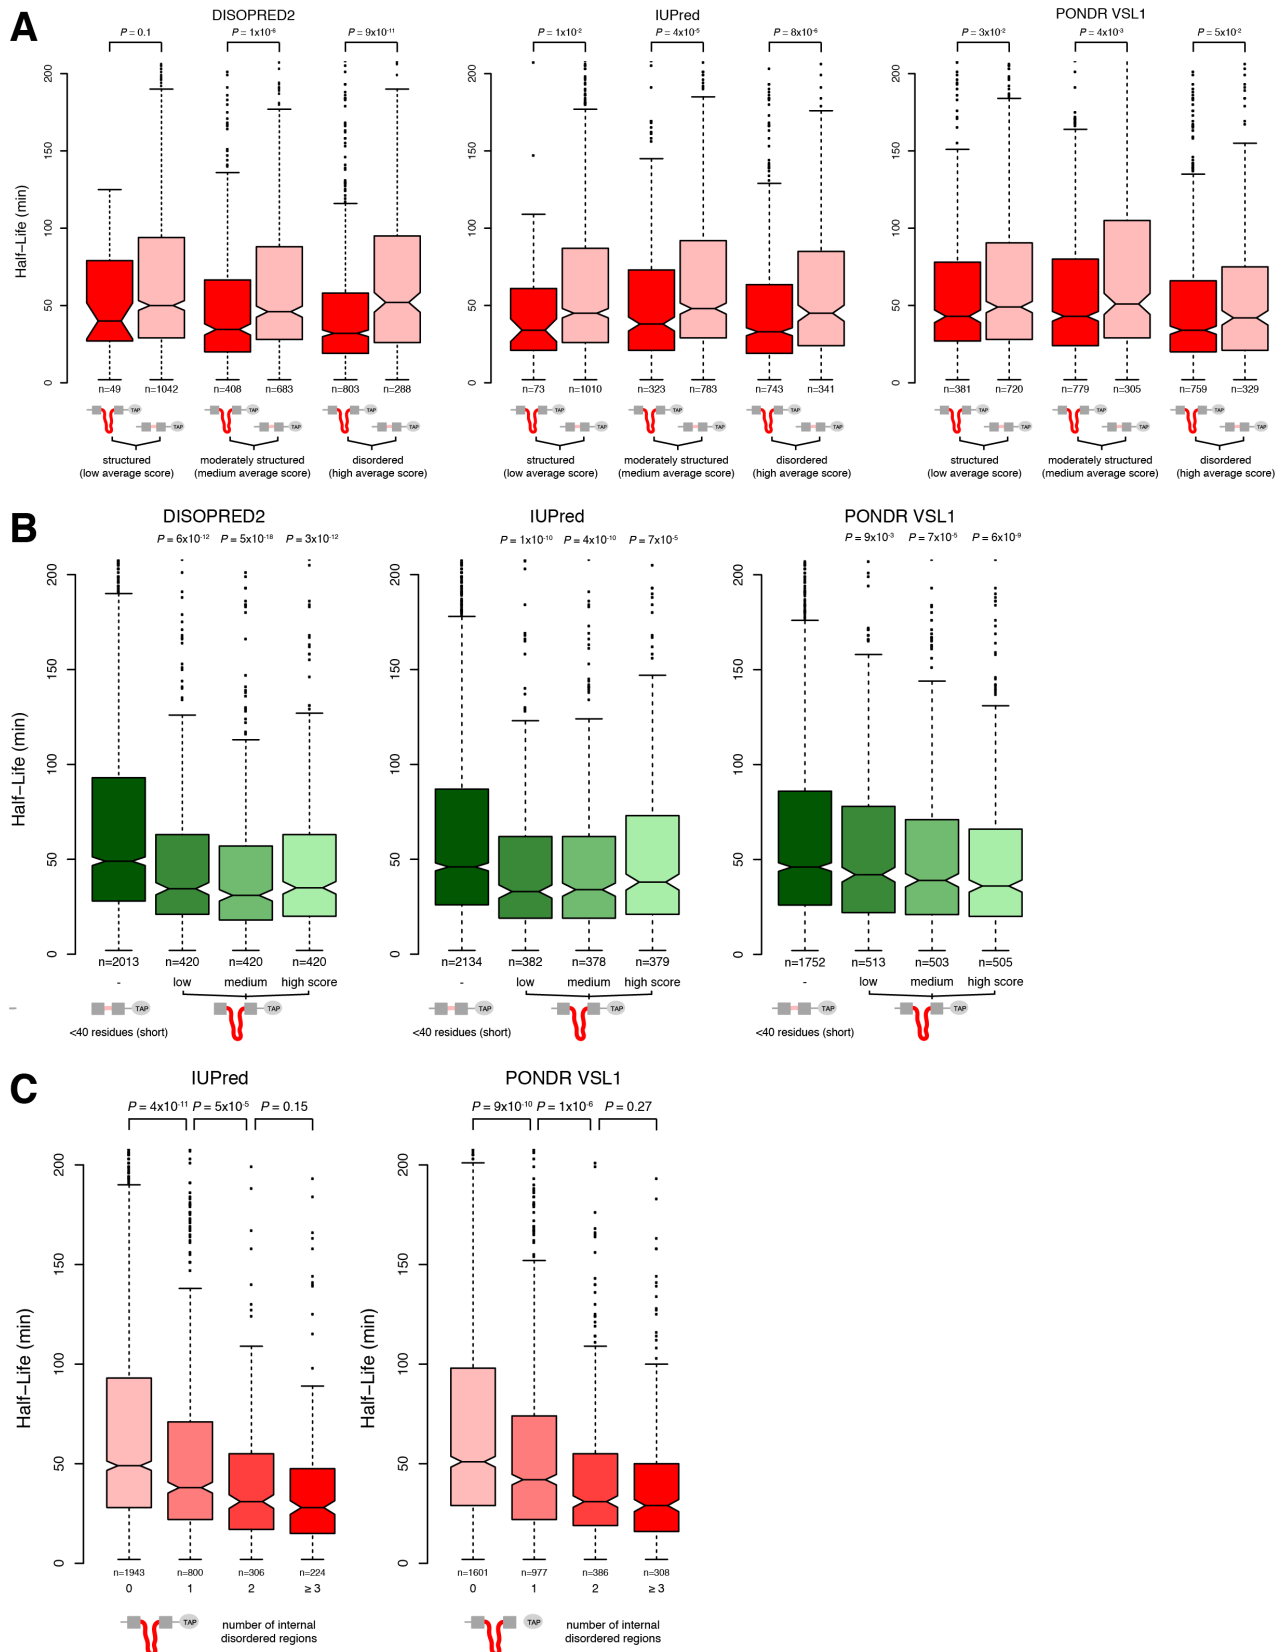

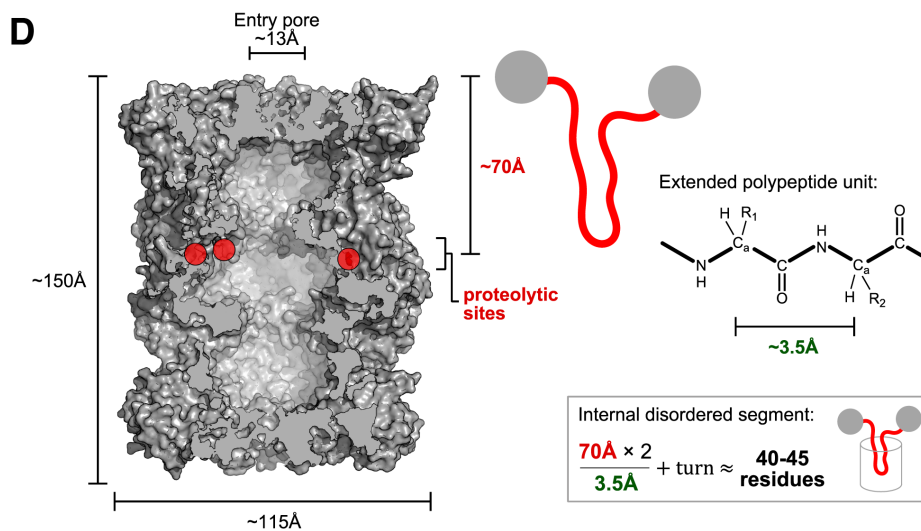

**Figure S2. Supplemental data for the effects of internal disordered segments on protein half-life, Related to Figure 2**

Boxplots of the distribution of half-life values and lengths of disordered segments for the different groups of proteins in *S. cerevisiae*. For further information about the plot content see **Figures 1 and 2** in the main text.

**(A) The results for internal disorder are independent of the average disorder scores of the proteins**

Proteins were divided into tertiles according to the average disorder score for the whole protein as reported by the three disorder predictors: DISOPRED2 (left), IUPred (middle) and PONDR VSL1 (right). The *P* values shown compare the disordered group to its non-disordered counterpart within the same score tertile, and were calculated using the Mann-Whitney *U* test.

**(B) The results are independent of the average disorder scores of the internal disordered segments**

Proteins were divided into tertiles according to the average disorder score for the internal disordered segment as reported by the three disorder predictors: DISOPRED2 (left), IUPred (middle) and PONDR VSL1 (right). The left-most boxplot in each panel (dark green) contains proteins without the disorder type of interest, i.e. proteins without an internal disordered segment. The *P* values shown compare each score tertile to the non-disordered group, using the Mann-Whitney *U* test.

**(C) Proteins with multiple internal disordered segments generally have shorter half-lives than those with fewer**

Proteins were classified based on the number of internal disordered segments (defined as continuous stretches of  $\geq 40$  disordered residues; from zero, to three or more, shown below each boxplot) as reported by disorder predictors IUPred (left) and PONDR VSL1 (right). The corresponding DISOPRED2 panel can be found in **Figure 2C** in the main text.

**(D) Calculation of the minimal number of residues that may constitute an internal disordered segment that is directly cleavable by the 20S proteasome**

The average distance from the 20S entry pore to the three proteolytic sites inside the proteasome is  $\sim 70\text{Å}$ . An extended polypeptide unit spans  $\sim 3.5\text{Å}$ . Therefore a conservative estimate of the minimum number of internal disordered residues that can be cleaved directly by the 20S proteasome is  $\sim 40-45$  amino acids. Distance measurements were done on the crystal structure of the 20S yeast proteasome (PDB ID: 1RYP (Groll et al., 1997)) using the PyMOL Molecular Graphics System, Version 1.3 (Schrodinger, 2010).



**Figure S3**

**A**

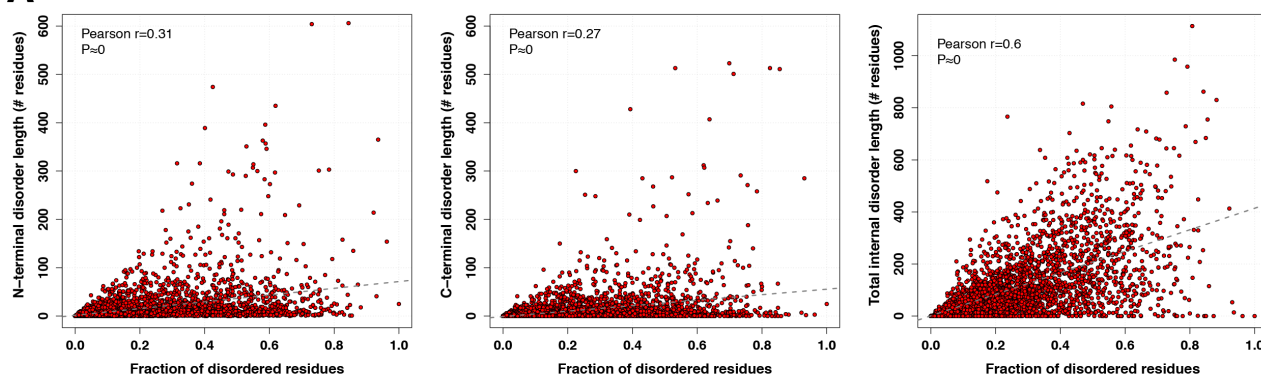

**B**

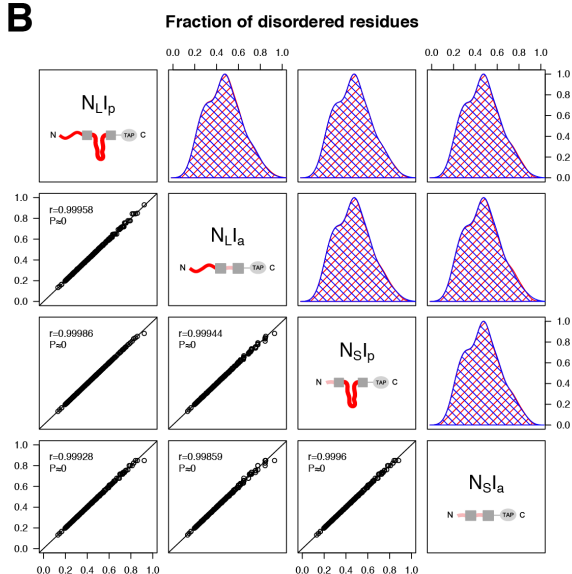

**E**

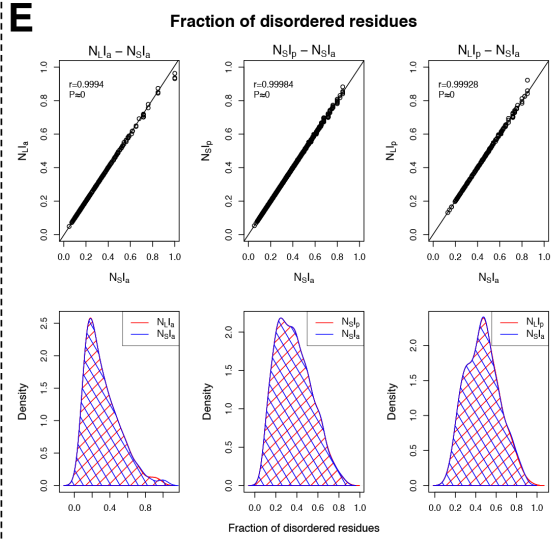

**C**

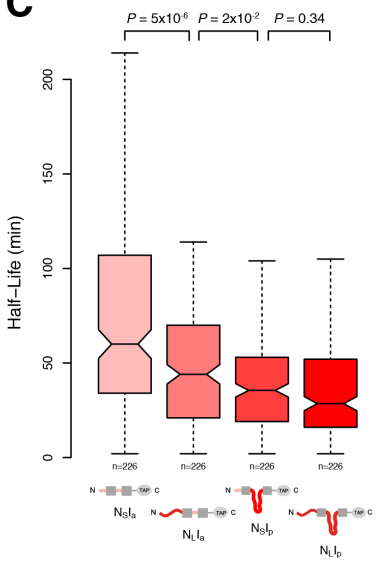

**D**

| Proteins matched by overall disorder degree |           |           |
|---------------------------------------------|-----------|-----------|
| $N_L I_p$                                   | 7         | 15.5      |
| 0.34                                        | $N_S I_p$ | 8.5       |
| 4e-3                                        | 2e-2      | $N_L I_a$ |
| 8e-10                                       | 1e-8      | 5e-6      |
|                                             |           | $N_S I_a$ |

| All proteins |           |           |
|--------------|-----------|-----------|
| $N_L I_p$    | 6.5       | 14        |
| 2e-2         | $N_S I_p$ | 8         |
| 6e-5         | 4e-3      | $N_L I_a$ |
| 3e-15        | 2e-24     | 3e-3      |
|              |           | $N_S I_a$ |

**F**

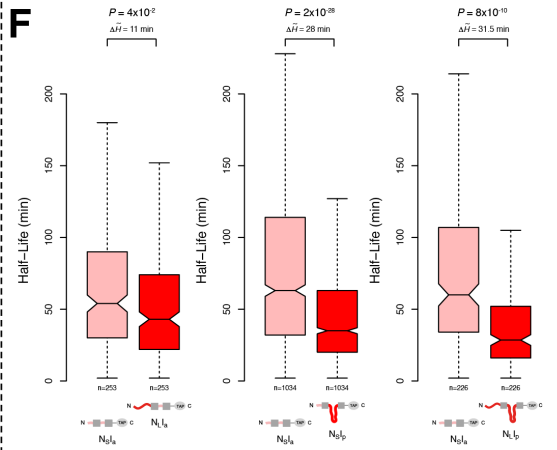

**G**

| Pairing             | Pairs | Unique $N_S I_a$ proteins | Maximal occurrences of non-unique $N_S I_a$ proteins |
|---------------------|-------|---------------------------|------------------------------------------------------|
| $N_L I_a - N_S I_a$ | 253   | 200 (79%)                 | 6                                                    |
| $N_S I_p - N_S I_a$ | 1034  | 402 (39%)                 | 20                                                   |
| $N_L I_p - N_S I_a$ | 226   | 125 (55%)                 | 9                                                    |

**H**

| Pairing             | Pairs with unique proteins | Effect size (N=1000) |        |       |     |      | P value (N=1000) |        |        |         |        |
|---------------------|----------------------------|----------------------|--------|-------|-----|------|------------------|--------|--------|---------|--------|
|                     |                            | Original             | Median | Mean  | Min | Max  | Original         | Median | Mean   | Min     | Max    |
| $N_L I_a - N_S I_a$ | 200                        | 11                   | 11     | 11.23 | 8.5 | 13.5 | 0.035            | 0.037  | 0.041  | 0.0060  | 0.14   |
| $N_S I_p - N_S I_a$ | 402                        | 28                   | 18     | 18.21 | 14  | 22   | 1.6e-28          | 1.1e-7 | 9.8e-7 | 3.0e-11 | 6.0e-5 |
| $N_L I_p - N_S I_a$ | 125                        | 31.5                 | 34     | 33.77 | 27  | 37   | 7.7e-10          | 9.6e-6 | 4e-5   | 2.9e-8  | 3.0e-3 |

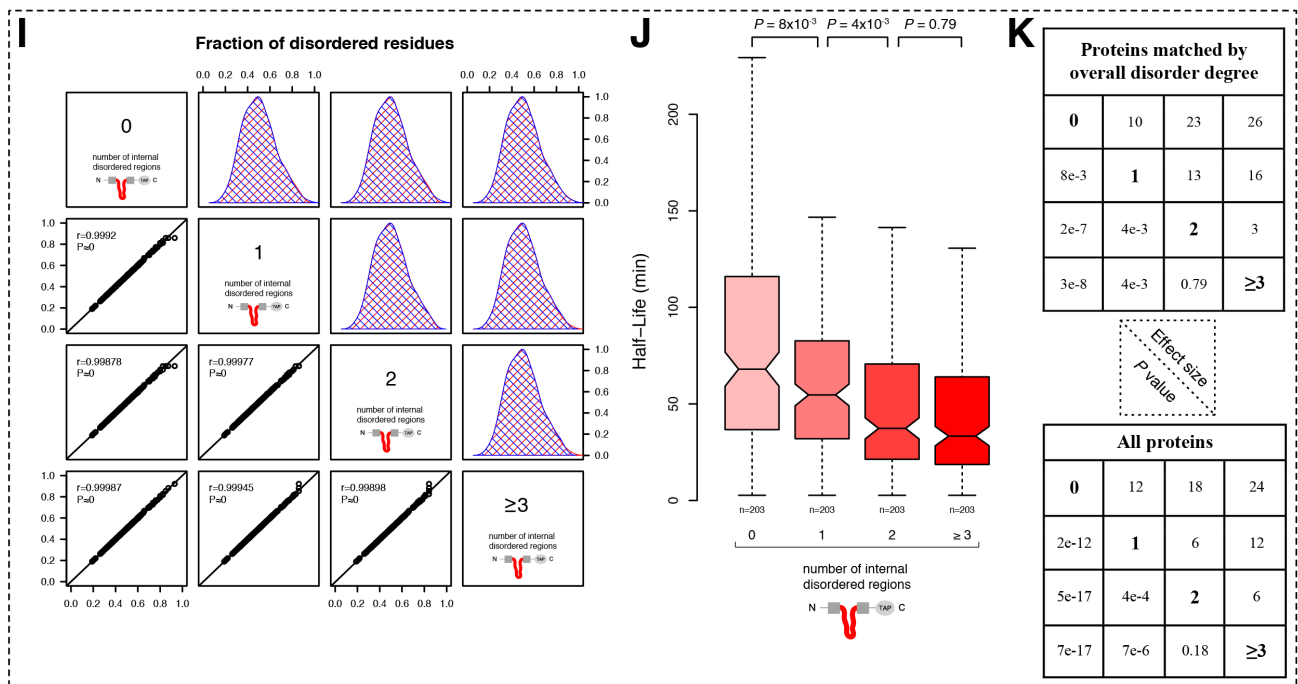

**Figure S3. Supplemental data showing that the effects of terminal and internal disordered segments on protein half-life are independent of the overall degree of disorder, Related to Figures 1 and 2**

For further information about the plot content see **Figures 1 and 2** in the main text.

**(A) The overall degree of disorder correlates with the length of disordered segments**

Correlations between N-terminal disorder length (left), C-terminal disorder length (middle), and total internal disorder length (right) and the fraction of disordered residues (i.e. overall degree of disorder) in a protein. Dotted gray lines represent the linear fits of  $y \sim x$ . Pearson  $r$  statistics and  $P$  values are reported within each plot. In the N-terminal (left) and C-terminal (middle) scatterplots, one data point above 600 residues in length was not shown to improve visualization.

**(B) Proteins with various combinations of disordered segments were matched by their overall degree of disorder**

Scatterplots (bottom-left triangle) and polygon overlays of the kernel density estimates (top-right triangle) of the overall disorder degree of pairs of proteins with various combinations of disordered segments (indicated in the diagonal squares). Pearson  $r$  statistics and  $P$  values are reported in the scatterplots. Disorder degree density estimates were calculated using a Gaussian kernel with a smoothing bandwidth given by Silverman's rule of thumb ( $\sim 0.05$  for all combinations) and were normalized to 1. The blue and red polygons correspond to the densities of the protein class to the left and to the bottom side of the plot, respectively. Correlations and density overlays indicate almost perfect linear correlation between the overall disorder degree of pairs of proteins from different classes, demonstrating that the matched proteins indeed have almost identical overall degrees of disorder.

**(C) The combined effects of disordered segments on protein half-life are independent of the overall degree of disorder**

Boxplots of the distribution of half-life values for proteins with various combinations of disordered segments in *S. cerevisiae*. Proteins were classified into those that have a long disordered N-terminus ( $N_L I_a$ ), those that have an internal disordered segment ( $N_S I_p$ ), those that have both a terminal and an internal disordered segment ( $N_L I_p$ ), and those that have neither ( $N_S I_a$ ). For each protein with a long N-terminal disordered segment that also has a long internal disordered segments ( $N_L I_p$ , 226 cases, the minority class), one protein from each of the other classes that is closest to the  $N_L I_p$  protein in terms of the fraction of disordered residues was selected.  $P$  values were calculated using the Wilcoxon Signed-Rank test, which is a non-parametric test for assessing difference between two paired samples.  $P$  values and median differences are also given in the top panel of **Figure S3D**.

**(D) Statistics for the differences between half-life distributions are comparable when assessing only proteins with similar overall disorder degree or when assessing all proteins**

$P$  values (bottom-left triangles) and absolute differences in half-life medians (effect size; top-right triangles) between half-life distributions of groups of proteins with various combinations of disordered segments. The top panel shows statistics based on matched proteins with similar overall degrees of disorder. Here,  $P$  values were calculated using the Wilcoxon Signed-Rank test, which is a non-parametric test for assessing difference between two paired samples. The bottom panel shows statistics based on all proteins. Here,  $P$  values were calculated using the Mann-Whitney  $U$  test.

**(E) Proteins with and without disordered segments were paired based on their overall degree of disorder**

Scatterplots (top) and polygon overlays of the kernel density estimates (bottom) of the overall disorder degree of protein pairs. Each  $N_S I_a$  protein was paired with a protein from each of the other classes based on the overall degree of disorder, making  $N_L I_a - N_S I_a$  (left),  $N_S I_p - N_S I_a$  (middle), and  $N_L I_p - N_S I_a$  pairs (right). Proteins with disordered segments were selected based on the absolute difference with the overall disorder degree of the  $N_S I_a$  protein. Pearson  $r$  statistics and  $P$

values are reported in the scatterplots. Disorder degree density estimates were calculated using a Gaussian kernel with a smoothing bandwidth given by Silverman's rule of thumb ( $\sim 0.056$  for  $N_{L}I_a - N_{S}I_a$ ;  $\sim 0.038$  for  $N_{S}I_p - N_{S}I_a$ ;  $\sim 0.050$  for  $N_{L}I_p - N_{S}I_a$ ). Correlations and density overlays indicate almost perfect linear correlation between the overall disorder degree of the various pairings, demonstrating that paired proteins selected using the above described method indeed have almost identical overall degrees of disorder.

**(F) The individual effects of disordered segments on protein half-life are independent of the overall degree of disorder**

Boxplots of the distribution of half-life values for proteins with and without disordered segments, paired on similar overall degree of disorder. Proteins were classified into those that have a long disordered N-terminus ( $N_{L}I_a$ ), those that have an internal disordered segment ( $N_{S}I_p$ ), those that have both a terminal and an internal disordered segment ( $N_{L}I_p$ ), and those that have neither ( $N_{S}I_a$ ). Each  $N_{S}I_a$  was paired with a protein from each of the other classes based on the overall degree of disorder, making  $N_{L}I_a - N_{S}I_a$  (left),  $N_{S}I_p - N_{S}I_a$  (middle), and  $N_{L}I_p - N_{S}I_a$  pairs (right). Reported  $P$  values were calculated using the Wilcoxon Signed-Rank test, which is a non-parametric test for assessing differences between two paired samples.  $\Delta\tilde{H}$  reports the difference between the half-life medians of the compared groups.

**(G) The number of unique proteins in pairs with and without disordered segments**

The approach for pairing proteins with disordered segments to proteins with no disordered segments ( $N_{S}I_a$ ) based on overall disorder degree similarity can result in an  $N_{S}I_a$  protein being sampled more than once. 'Pairs' shows the total number of pairs and equals to the number of proteins from the class that has least proteins (in all pairings this is the class with disordered segments). 'Unique  $N_{S}I_a$  proteins' shows the number of unique proteins without disordered segments ( $N_{S}I_a$ ); the difference with the 'Pairs' column indicates the number of pairs containing  $N_{S}I_a$  proteins that have been sampled more than once (i.e. in multiple pairs). 'Maximal occurrences of non-unique  $N_{S}I_a$  proteins' shows how often the most abundantly sampled  $N_{S}I_a$  protein occurs and is an indication of the number of duplicate data points resulting from the pairing based on disorder degree similarity.

**(H) Statistics of half-life differences of paired proteins with and without disordered segments**

Protein pairs containing a protein without disordered segments ( $N_{S}I_a$ ) that occurs in multiple pairs were randomly removed until individual proteins occur only once. The procedure was repeated 1000 times to assess the robustness of the results. 'Pairs with unique proteins' shows the number of proteins pairs that remain after removing pairs containing non-unique  $N_{S}I_a$  proteins. Effect sizes (difference in median half-life) and  $P$  values (Wilcoxon Signed-Rank test) were calculated for the differences between half-life distributions of proteins with and without disordered segments (comparing  $N_{L}I_a$  with  $N_{S}I_a$ , top row;  $N_{S}I_p$  with  $N_{S}I_a$ , middle row; and  $N_{L}I_p$  with  $N_{S}I_a$ , bottom row). 'Original' columns show the effect sizes and  $P$  values for the full paired dataset (i.e. including non-unique  $N_{S}I_a$  proteins; **Figure S3F**). 'Median', 'Mean', 'Min', and 'Max' describe the effect size and  $P$  value distributions resulting from the 1000 randomizations.

**(I) Proteins with different numbers of internal disordered segments were matched by their overall degree of disorder**

Scatterplots (bottom-left triangle) and polygon overlays of the kernel density estimates (top-right triangle) of the overall disorder degree of pairs of proteins with different numbers of internal disordered segments (from zero to three or more, indicated in the diagonal squares). Pearson  $r$  statistics and  $P$  values are reported in the scatterplots. Disorder degree density estimates were calculated using a Gaussian kernel with a smoothing bandwidth given by Silverman's rule of thumb ( $\sim 0.045$  for all combinations) and were normalized to 1. The blue and red polygons correspond to the densities of the protein class to the left and to the bottom side of the plot, respectively. Correlations and density overlays indicate almost perfect linear correlation between the overall disorder degree of pairs of proteins from different classes, demonstrating that the matched proteins indeed have almost identical overall degree of disorder.

**(J) The effects of multiple internal disordered segments on protein half-life are independent of the overall degree of disorder**

Boxplots of the distribution of half-life values for proteins with different numbers of internal disordered segments (from zero to three or more) in *S. cerevisiae*. For each protein with three or more internal disordered segments (203 proteins, the minority class), one protein from each of the other classes that is closest in terms of the fraction of disordered residues was selected.  $P$  values were calculated using the Wilcoxon Signed-Rank test, which is a non-parametric test for assessing difference between two paired samples.  $P$  values and median differences are also given in the top panel of **Figure S3K**.

**(K) Statistics for the differences between half-life distributions are comparable when assessing only proteins with similar overall disorder degree or when assessing all proteins**

$P$  values (bottom-left triangles) and absolute differences in half-life medians (effect size; top-right triangles) between half-life distributions of groups of proteins with different numbers of internal disordered segments. The top panel shows statistics based on matched proteins with similar overall degrees of disorder. Here,  $P$  values were calculated using the Wilcoxon Signed-Rank test, which is a non-parametric test for assessing difference between two paired samples. The bottom panel shows statistics based on all proteins. Here,  $P$  values were calculated using the Mann-Whitney  $U$  test.

**Figure S4**

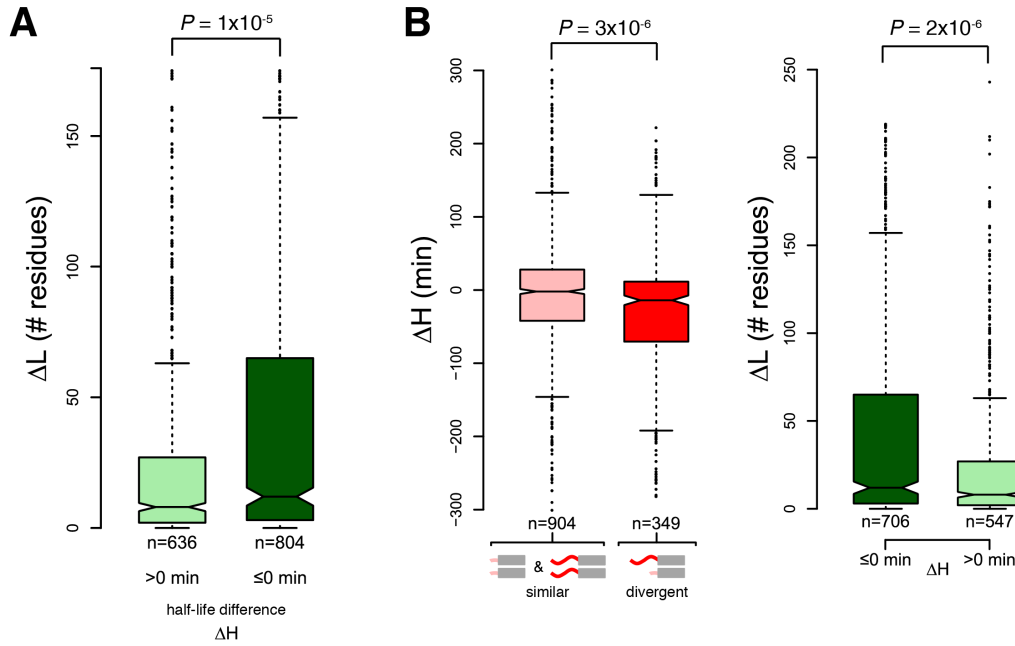

**Figure S4. Supplemental data for the effects of N-terminal disorder on protein half-life in paralog pairs, Related to Figure 4**

**(A) Paralogous pairs with a negative half-life change have larger divergence in the length of N-terminal disorder**

Boxplots of the distribution of N-terminal disorder difference values  $\Delta L$  within paralog pairs (defined as  $\Delta L = L_1 - L_2$ ;  $L_1 \geq L_2$ ), grouped by their half-life difference  $\Delta H$ . Left:  $\Delta H > 0$  min. Right:  $\Delta H \leq 0$  min. The length of N-terminal disordered segments changes more in paralog pairs where divergence in disorder coincides with half-life decrease (negative half-life change); see also **Supplemental Results S4**. Outliers with  $\Delta L > 175$  are not shown to improve visualization. For further information about the plot content see **Figure 4** in the main text.

**(B) Results of the paralogous protein analysis, without paralogs resulting from the ancestral yeast whole-genome duplication**

**(left)** Boxplots of the distribution of half-life difference values  $\Delta H$ . Paralog pairs are grouped by the difference in their N-terminal disorder length: (i) either both paralogs have a short ( $\leq 30$  residues) or both have a long ( $> 30$  residues) disordered N-terminus (light red, left boxplot of the two), and (ii) one paralog has a short, the other a long disordered N-terminus (dark red, right boxplot of the two). **(right)** Boxplots of the distribution of N-terminal disorder difference values  $\Delta L$ . Paralog pairs have been grouped by their half-life difference  $\Delta H$ :  $\Delta H \leq 0$  min (dark green, left boxplot of the two) and  $\Delta H > 0$  min (light green, right boxplot of the two). Outliers with  $\Delta H > 300$  (left) and  $\Delta L > 250$  (right) are not shown to improve visualization. For further information about the plot content see **Figure 4** in the main text. The number of paralogous protein pairs resulting from the ancestral yeast whole genome duplication alone and for which we have half-life and disorder data was too small to make meaningful comparisons of their  $\Delta H$  and  $\Delta L$ . Therefore, an analysis of whole-genome paralogs alone could not be performed.

# Supplemental Tables

## Table S1, Related to Figures 1 and 2

**Table S1A. Compendium of datasets used in our study**

| Type of information<br>[source]                                                                    | Description of the method used to obtain the data                                                                                                                                                                                                                                          |
|----------------------------------------------------------------------------------------------------|--------------------------------------------------------------------------------------------------------------------------------------------------------------------------------------------------------------------------------------------------------------------------------------------|
| <b>Disorder predictions</b><br>(Dosztanyi et al., 2005; Obradovic et al., 2005; Ward et al., 2004) | The disorder status of every residue in the yeast, mouse, and human proteomes was inferred using the DISOPRED2, IUPRED, and PONDR VLS1 predictors.                                                                                                                                         |
| <b>Protein half-life</b><br><i>Yeast</i><br>(Belle et al., 2006)                                   | <i>In vivo</i> protein half-lives were determined by first inhibiting protein synthesis with the antibiotic cycloheximide and then monitoring the abundance of each C-terminally TAP-tagged protein in the yeast genome by quantitative Western blotting at three time points.             |
| <i>Mouse</i><br>(Schwanhausser et al., 2011)                                                       | <i>In vivo</i> protein half-lives in NIH3T3 mouse fibroblasts were derived from the ratio between the heavy and light peptides, measured using mass spectrometry at different time points after the transfer of cells from light to heavy medium.                                          |
| <i>Human</i><br>(Kristensen et al., 2013)                                                          | <i>In vivo</i> relative degradation rates in human THP-1 myelomonocytic leukemia cells, under conditions that stimulate cell proliferation, were determined using a similar SILAC MS approach as in mouse, above.                                                                          |
| <b>Paralogs</b><br>(Altschul et al., 1990; Wolfe and Shields, 1997)                                | A list of paralogous proteins in yeast was obtained from an all-against-all protein sequence comparison followed by clustering using the program BLASTClust. This list was supplemented with more divergent pairs of paralogs that arose from the whole genome duplication event in yeast. |
| <b>Degradation signals</b><br><i>Ubiquitination</i><br>(Uniprot-Consortium, 2011)                  | Experimentally determined ubiquitination sites were obtained from UniProtKB/Swiss-Prot.                                                                                                                                                                                                    |
| <i>KEN, Destruction box motifs</i><br>(Liu et al., 2012; Pflieger and Kirschner, 2000)             | KEN box and destruction box motifs were predicted using GPS-ARM 1.0.                                                                                                                                                                                                                       |
| <i>PEST sequences</i><br>(Rice et al., 2000; Rogers et al., 1986)                                  | PEST regions were predicted using epestfind with default parameters, as included in EMBOSS 6.5.7.                                                                                                                                                                                          |
| <i>N-end rule</i><br>(Bachmair et al., 1986)                                                       | Frequencies of amino acids in the second N-terminal residue (after removal of the initiator methionine) were calculated for the yeast, mouse and human proteomes.                                                                                                                          |
| <b>Sequence motifs</b><br>(Davey et al., 2010; Neduva et al., 2005)                                | SLiMFinder and DiliMot were used to analyze the amino acid sequences of disordered segments of proteins with short half-life for shared sequence patterns that potentially facilitate rapid degradation.                                                                                   |
| <b>Protein abundance</b><br>(Newman et al., 2006)                                                  | Protein levels during log-phase growth of yeast were obtained by flow cytometry measurements of GFP-tagged strains.                                                                                                                                                                        |
| <b>Subcellular localization</b><br>(Christie et al., 2004)                                         | Subcellular localization information (cytoplasm and nucleus) was obtained from the Saccharomyces Genome Database.                                                                                                                                                                          |
| <b>Membrane proteins</b><br>(Kim et al., 2006; Melen et al., 2003; Osterberg et al., 2006)         | Membrane protein topologies were previously determined by measurements of the location of the C-terminus (cytosolic or extracellular, determined using tagged constructs), which was used to constrain topology predictions by TMHMM.                                                      |

Median values ( $\tilde{x}$ )  $\pm$  confidence interval (C.I. =  $1.58(IQR/\sqrt{n})$ , where IQR is the interquartile range and ‘n’ the group sample size) are reported for different groups of proteins. The IQR is calculated as the difference between the data points at the  $\times 0.75$  and  $\times 0.25$  quartiles. *P* values for the differences in the distributions of half-life values between the different groups (‘long’ versus ‘short’ and ‘yes’ versus ‘no’) were calculated using the Mann-Whitney *U* test and are reported in parentheses.

**Table S1B. Summary of boxplot parameters and significance estimates for the effects of disordered segments on protein half-life in yeast (DISOPRED2)**  
Related to **Figures 1B, 1C and 2A.**

| Property                           |                             | $\tilde{x} \pm$ C.I. (Half-Life [min]) | n    |
|------------------------------------|-----------------------------|----------------------------------------|------|
| <b>N-terminal disorder length</b>  | Long (>30 residues)         | 35 $\pm$ 3.4                           | 479  |
|                                    | Short ( $\leq$ 30 residues) | 44 $\pm$ 1.7 ( $5 \times 10^{-6}$ )    | 2794 |
| <b>C-terminal disorder length</b>  | Long (>30 residues)         | 43.5 $\pm$ 4.7                         | 352  |
|                                    | Short ( $\leq$ 30 residues) | 43 $\pm$ 1.7 (0.99)                    | 2921 |
| <b>Internal disordered segment</b> | yes ( $\geq$ 40 residues)   | 34 $\pm$ 1.9                           | 1260 |
|                                    | no (<40 residues)           | 49 $\pm$ 2.3 ( $3 \times 10^{-29}$ )   | 2013 |

**Table S1C. The results are independent of the method used to predict intrinsic protein disorder – IUPred**

| Property                           |                             | $\tilde{x} \pm$ C.I. (Half-Life [min]) | n    |
|------------------------------------|-----------------------------|----------------------------------------|------|
| <b>N-terminal disorder length</b>  | Long (>30 residues)         | 32 $\pm$ 2.5                           | 694  |
|                                    | Short ( $\leq$ 30 residues) | 46 $\pm$ 1.9 ( $9 \times 10^{-18}$ )   | 2579 |
| <b>C-terminal disorder length</b>  | Long (>30 residues)         | 40 $\pm$ 3.4                           | 642  |
|                                    | Short ( $\leq$ 30 residues) | 43 $\pm$ 1.8 (0.13)                    | 2631 |
| <b>Internal disordered segment</b> | yes ( $\geq$ 40 residues)   | 34 $\pm$ 1.9                           | 1330 |
|                                    | no (<40 residues)           | 49 $\pm$ 2.3 ( $4 \times 10^{-29}$ )   | 1943 |

**Table S1D. The results are independent of the method used to predict intrinsic protein disorder – PONDR VSL1**

| Property                           |                             | $\tilde{x} \pm$ C.I. (Half-Life [min]) | n    |
|------------------------------------|-----------------------------|----------------------------------------|------|
| <b>N-terminal disorder length</b>  | Long (>30 residues)         | 36 $\pm$ 2.4                           | 875  |
|                                    | Short ( $\leq$ 30 residues) | 45 $\pm$ 1.9 ( $6 \times 10^{-12}$ )   | 2397 |
| <b>C-terminal disorder length</b>  | Long (>30 residues)         | 39 $\pm$ 3.1                           | 809  |
|                                    | Short ( $\leq$ 30 residues) | 44 $\pm$ 1.8 ( $1 \times 10^{-2}$ )    | 2463 |
| <b>Internal disordered segment</b> | yes ( $\geq$ 40 residues)   | 36 $\pm$ 1.7                           | 1671 |
|                                    | no (<40 residues)           | 51 $\pm$ 2.7 ( $3 \times 10^{-27}$ )   | 1601 |

**Table S1E. Disordered segments of different lengths influence protein half-life**

Length cutoffs of 30 terminal disordered residues and 40 internal disordered residues produce the largest differences between the half-lives of proteins with and without disordered segments, but shorter and longer segments also contribute to shorter protein half-life.

| Property                                         |                      | $\tilde{x} \pm \text{C.I. (Half-Life [min])}$ | n    |
|--------------------------------------------------|----------------------|-----------------------------------------------|------|
| <b>N-terminal disorder length in # residues</b>  |                      |                                               |      |
| cutoff = 20                                      | Long (>20 residues)  | 37 ± 3.0                                      | 739  |
|                                                  | Short (≤20 residues) | 44 ± 1.8 (3x10 <sup>-4</sup> )                | 2534 |
| cutoff = 25                                      | Long (>25 residues)  | 36 ± 3.2                                      | 588  |
|                                                  | Short (≤25 residues) | 44 ± 1.7 (1x10 <sup>-4</sup> )                | 2685 |
| cutoff = 30 (standard)                           | Long (>30 residues)  | 35 ± 3.4                                      | 479  |
|                                                  | Short (≤30 residues) | 44 ± 1.7 (5x10 <sup>-6</sup> )                | 2794 |
| cutoff = 35                                      | Long (>35 residues)  | 34 ± 3.4                                      | 421  |
|                                                  | Short (≤35 residues) | 44 ± 1.7 (2x10 <sup>-6</sup> )                | 2852 |
| cutoff = 40                                      | Long (>40 residues)  | 33.5 ± 3.6                                    | 366  |
|                                                  | Short (≤40 residues) | 44 ± 1.7 (1x10 <sup>-5</sup> )                | 2907 |
| <b>C-terminal disorder length in # residues</b>  |                      |                                               |      |
| cutoff = 20                                      | Long (>20 residues)  | 44 ± 3.8                                      | 498  |
|                                                  | Short (≤20 residues) | 42 ± 1.7 (0.44)                               | 2775 |
| cutoff = 25                                      | Long (>25 residues)  | 44 ± 4.3                                      | 401  |
|                                                  | Short (≤25 residues) | 42 ± 1.7 (0.63)                               | 2872 |
| cutoff = 30 (standard)                           | Long (>30 residues)  | 43.5 ± 4.7                                    | 352  |
|                                                  | Short (≤30 residues) | 43 ± 1.7 (0.99)                               | 2921 |
| cutoff = 35                                      | Long (>35 residues)  | 43 ± 5.3                                      | 292  |
|                                                  | Short (≤35 residues) | 43 ± 1.6 (0.98)                               | 2981 |
| cutoff = 40                                      | Long (>40 residues)  | 43 ± 5.7                                      | 238  |
|                                                  | Short (≤40 residues) | 43 ± 1.6 (0.71)                               | 3035 |
| <b>Internal disordered segment in # residues</b> |                      |                                               |      |
| cutoff = 30                                      | yes (≥30 residues)   | 36 ± 1.8                                      | 1573 |
|                                                  | no (<30 residues)    | 50 ± 2.5 (3x10 <sup>-24</sup> )               | 1700 |
| cutoff = 35                                      | yes (≥35 residues)   | 35 ± 1.8                                      | 1428 |
|                                                  | no (<35 residues)    | 49 ± 2.4 (1x10 <sup>-24</sup> )               | 1845 |
| cutoff = 40 (standard)                           | yes (≥40 residues)   | 34 ± 1.9                                      | 1260 |
|                                                  | no (<40 residues)    | 49 ± 2.3 (3x10 <sup>-29</sup> )               | 2013 |
| cutoff = 45                                      | yes (≥45 residues)   | 34 ± 1.9                                      | 1128 |
|                                                  | no (<45 residues)    | 48 ± 2.1 (4x10 <sup>-25</sup> )               | 2145 |
| cutoff = 50                                      | yes (≥50 residues)   | 33 ± 2.1                                      | 1014 |
|                                                  | no (<50 residues)    | 47 ± 2 (1x10 <sup>-23</sup> )                 | 2259 |

**Table S1F. Function enrichment analysis of proteins with long N-terminal disorder, long C-terminal disorder, and long N-terminal structure**

Function enrichment was determined using the functional annotation tool of the DAVID suite version 6.7 (Huang da et al., 2009a, b), with default settings and a false discovery rate of 0.01. Entries from the Functional Annotation Chart are shown for each protein group, excluding UniProt sequence features. In cases where multiple entries form a cluster at medium stringency according to the Functional Annotation Clustering view, only the entry with the lowest q-value is shown for conciseness. Background: all yeast proteins.

| <b>Proteins with long N-terminal disorder (&gt;30 aa) (n=479)</b> |                                 |                         |            |            |         |
|-------------------------------------------------------------------|---------------------------------|-------------------------|------------|------------|---------|
| Source                                                            | Term                            | Term type or identifier | Percentage | Enrichment | q-value |
| SP_PIR_KEYWORDS                                                   | phosphoprotein                  | -                       | 74.7%      | 1.84       | 1.1e-52 |
| SP_PIR_KEYWORDS                                                   | serine/threonine-protein kinase | -                       | 9.0%       | 4.78       | 1.9e-15 |
| SP_PIR_KEYWORDS                                                   | nucleus                         | -                       | 43.0%      | 1.70       | 2.1e-15 |
| SP_PIR_KEYWORDS                                                   | transcription regulation        | -                       | 17.1%      | 2.33       | 1.9e-10 |
| GOTERM_BP_FAT                                                     | regulation of transcription     | GO:0045449              | 21.7%      | 1.79       | 8.3e-07 |
| INTERPRO                                                          | AGC-kinase, C-terminal          | IPR000961               | 1.9%       | 7.73       | 0.0048  |
| GOTERM_CC_FAT                                                     | plasma membrane                 | GO:0005886              | 12.5%      | 1.80       | 0.006   |
| GOTERM_CC_FAT                                                     | nuclear lumen                   | GO:0031981              | 14.6%      | 1.70       | 0.0069  |
| GOTERM_CC_FAT                                                     | ribonucleoprotein complex       | GO:0030529              | 15.4%      | 1.66       | 0.0083  |

  

| <b>Proteins with long C-terminal disorder (&gt;30 aa) (n=352)</b> |                |                         |            |            |         |
|-------------------------------------------------------------------|----------------|-------------------------|------------|------------|---------|
| Source                                                            | Term           | Term type or identifier | Percentage | Enrichment | q-value |
| SP_PIR_KEYWORDS                                                   | phosphoprotein | -                       | 70.5%      | 1.74       | 3.9e-28 |
| GOTERM_CC_FAT                                                     | nuclear lumen  | GO:0031981              | 22.7%      | 2.37       | 3e-11   |
| SP_PIR_KEYWORDS                                                   | nucleus        | -                       | 43.5%      | 1.71       | 5e-11   |
| GOTERM_CC_FAT                                                     | nucleolus      | GO:0005730              | 12.8%      | 2.71       | 1.1e-06 |
| SP_PIR_KEYWORDS                                                   | rna-binding    | -                       | 11.4%      | 2.44       | 0.0003  |

  

| <b>Proteins with long N-terminal structure (&gt;30 aa) (n=873)</b> |                       |                         |            |            |         |
|--------------------------------------------------------------------|-----------------------|-------------------------|------------|------------|---------|
| Source                                                             | Term                  | Term type or identifier | Percentage | Enrichment | q-value |
| SP_PIR_KEYWORDS                                                    | cytoplasm             | -                       | 29.4%      | 1.36       | 7.7e-06 |
| SP_PIR_KEYWORDS                                                    | wd repeat             | -                       | 3.9%       | 2.37       | 0.0025  |
| SP_PIR_KEYWORDS                                                    | endoplasmic reticulum | -                       | 8.9%       | 1.68       | 0.0029  |
| SP_PIR_KEYWORDS                                                    | oxidoreductase        | -                       | 7.0%       | 1.77       | 0.0096  |



**Table S1G. The results are independent of protein length**  
Related to **Figure S1G**.

| Property                     |                             | $\tilde{x} \pm \text{C.I. (Half-Life [min])}$                           | n    |
|------------------------------|-----------------------------|-------------------------------------------------------------------------|------|
| <b>Protein length</b>        |                             | <i>N-terminal disorder length</i>                                       |      |
| Small ( $\leq 350$ residues) | Long ( $>30$ residues)      | $56 \pm 10.6$                                                           | 91   |
|                              | Short ( $\leq 30$ residues) | $56 \pm 4.1 (0.73)$                                                     | 1032 |
| Medium (351-600 residues)    | Long ( $>30$ residues)      | $39 \pm 5.9$                                                            | 161  |
|                              | Short ( $\leq 30$ residues) | $44 \pm 2.6 (5 \times 10^{-2})$                                         | 947  |
| Large ( $>600$ residues)     | Long ( $>30$ residues)      | $29 \pm 3.5$                                                            | 227  |
|                              | Short ( $\leq 30$ residues) | $33 \pm 2.0 (3 \times 10^{-2})$                                         | 815  |
| <b>Protein length</b>        |                             | <i>C-terminal disorder length</i>                                       |      |
| Small ( $\leq 350$ residues) | Long ( $>30$ residues)      | $76 \pm 13.1$                                                           | 92   |
|                              | Short ( $\leq 30$ residues) | $54 \pm 3.9 (0.01, \tilde{x}_{\text{Long}} > \tilde{x}_{\text{Short}})$ | 1031 |
| Medium (350-600 residues)    | Long ( $>30$ residues)      | $40 \pm 6.7$                                                            | 128  |
|                              | Short ( $\leq 30$ residues) | $44 \pm 2.6 (0.30)$                                                     | 980  |
| Large ( $>600$ residues)     | Long ( $>30$ residues)      | $32.5 \pm 4.7$                                                          | 132  |
|                              | Short ( $\leq 30$ residues) | $32 \pm 1.9 (0.92)$                                                     | 910  |
| <b>Protein length</b>        |                             | <i>Internal disordered segment</i>                                      |      |
| Small ( $\leq 350$ residues) | yes ( $\geq 40$ residues)   | $45 \pm 6.5$                                                            | 205  |
|                              | no ( $<40$ residues)        | $59 \pm 4.5 (2 \times 10^{-4})$                                         | 918  |
| Medium (350-600 residues)    | yes ( $\geq 40$ residues)   | $35 \pm 3.2$                                                            | 387  |
|                              | no ( $<40$ residues)        | $50 \pm 3.2 (2 \times 10^{-8})$                                         | 721  |
| Large ( $>600$ residues)     | yes ( $\geq 40$ residues)   | $30.5 \pm 2.3$                                                          | 668  |
|                              | no ( $<40$ residues)        | $35 \pm 2.9 (4 \times 10^{-3})$                                         | 374  |

**Table S1H. The results are independent of protein abundance**

Data on protein abundance for *S. cerevisiae* grown in rich medium (YEPD) were obtained from Newman *et al.* (Newman *et al.*, 2006). Proteins were divided into abundance tertiles, resulting in the low, medium and high abundance categories.

| Property                       |                             | $\tilde{x} \pm \text{C.I. (Half-Life [min])}$ | n   |
|--------------------------------|-----------------------------|-----------------------------------------------|-----|
| <b>Protein abundance</b>       |                             | <i>N-terminal disorder length</i>             |     |
| Low ( $\leq 117.5$ arb. units) | Long ( $>30$ residues)      | $34 \pm 7.5$                                  | 93  |
|                                | Short ( $\leq 30$ residues) | $41 \pm 4.2 (1 \times 10^{-2})$               | 500 |
| Medium (117.5-324.5 a.u.)      | Long ( $>30$ residues)      | $46 \pm 7.9$                                  | 91  |
|                                | Short ( $\leq 30$ residues) | $52 \pm 4.4 (3 \times 10^{-2})$               | 501 |
| High ( $>324.5$ a.u.)          | Long ( $>30$ residues)      | $54 \pm 10.8$                                 | 87  |
|                                | Short ( $\leq 30$ residues) | $62 \pm 6 (8 \times 10^{-2})$                 | 505 |
| <b>Protein abundance</b>       |                             | <i>C-terminal disorder length</i>             |     |
| Low ( $\leq 117.5$ a.u.)       | Long ( $>30$ residues)      | $30.5 \pm 9.8$                                | 70  |
|                                | Short ( $\leq 30$ residues) | $41 \pm 3.9 (2 \times 10^{-2})$               | 523 |
| Medium (117.5-324.5 a.u.)      | Long ( $>30$ residues)      | $51.5 \pm 8.1$                                | 76  |
|                                | Short ( $\leq 30$ residues) | $51 \pm 4.3 (0.39)$                           | 516 |
| High ( $>324.5$ a.u.)          | Long ( $>30$ residues)      | $54 \pm 13.1$                                 | 89  |
|                                | Short ( $\leq 30$ residues) | $63 \pm 5.9 (0.13)$                           | 503 |
| <b>Protein abundance</b>       |                             | <i>Internal disordered segment</i>            |     |
| Low ( $\leq 117.5$ a.u.)       | yes ( $\geq 40$ residues)   | $35 \pm 4.2$                                  | 262 |
|                                | no ( $<40$ residues)        | $45 \pm 5.4 (7 \times 10^{-5})$               | 331 |
| Medium (117.5-324.5 a.u.)      | yes ( $\geq 40$ residues)   | $44 \pm 4.6$                                  | 232 |
|                                | no ( $<40$ residues)        | $56 \pm 6 (2 \times 10^{-5})$                 | 360 |
| High ( $>324.5$ a.u.)          | yes ( $\geq 40$ residues)   | $44 \pm 6.8$                                  | 160 |
|                                | no ( $<40$ residues)        | $69 \pm 7.2 (1 \times 10^{-7})$               | 432 |

**Table S11. The trends are not affected by cytoplasmic or nuclear localization**

Subcellular localization information (cytoplasm and nucleus) was obtained from the Saccharomyces Genome Database (Christie et al., 2004). Note that nuclear proteins display shorter half-lives and increased disorder relative to cytoplasmic proteins.

| Property                    |                                    | $\tilde{x} \pm \text{C.I.}$    | n                               |      |
|-----------------------------|------------------------------------|--------------------------------|---------------------------------|------|
| <b>Protein localization</b> | Nucleus                            | 39 ± 2.3                       | 1305                            |      |
|                             | Cytoplasm                          | 45 ± 2.6 (6x10 <sup>-4</sup> ) | 1378                            |      |
| <b>Protein localization</b> | <i>N-terminal disorder length</i>  |                                |                                 |      |
|                             | Nucleus                            | Long (>30 residues)            | 33 ± 4.4                        | 238  |
|                             |                                    | Short (≤30 residues)           | 41 ± 2.7 (2x10 <sup>-4</sup> )  | 1067 |
|                             | Cytoplasm                          | Long (>30 residues)            | 35.5 ± 5                        | 208  |
| Short (≤30 residues)        |                                    | 47 ± 3.1 (2x10 <sup>-4</sup> ) | 1170                            |      |
| <b>Protein localization</b> | <i>C-terminal disorder length</i>  |                                |                                 |      |
|                             | Nucleus                            | Long (>30 residues)            | 39.5 ± 6.1                      | 172  |
|                             |                                    | Short (≤30 residues)           | 39 ± 2.5 (0.61)                 | 1133 |
|                             | Cytoplasm                          | Long (>30 residues)            | 44 ± 8.3                        | 139  |
| Short (≤30 residues)        |                                    | 45 ± 2.8 (0.53)                | 1239                            |      |
| <b>Protein localization</b> | <i>Internal disordered segment</i> |                                |                                 |      |
|                             | Nucleus                            | yes (≥40 residues)             | 32 ± 2.7                        | 610  |
|                             |                                    | no (<40 residues)              | 48 ± 3.9 (4x10 <sup>-14</sup> ) | 695  |
|                             | Cytoplasm                          | yes (≥40 residues)             | 33.5 ± 3.1                      | 496  |
| no (<40 residues)           |                                    | 54 ± 4 (1x10 <sup>-19</sup> )  | 882                             |      |

  

|                                                  |  | Half-life [min]                            |      |
|--------------------------------------------------|--|--------------------------------------------|------|
| Nucleus                                          |  | 39 ± 2.3                                   | 1305 |
| Cytoplasm                                        |  | 45 ± 2.6 (6x10 <sup>-4</sup> )             | 1378 |
|                                                  |  | N-terminal disorder length [residues]      |      |
| Nucleus                                          |  | 9 ± 0.9                                    | 1305 |
| Cytoplasm                                        |  | 8 ± 0.6 (4x10 <sup>-4</sup> )              | 1378 |
|                                                  |  | C-terminal disorder length [residues]      |      |
| Nucleus                                          |  | 3 ± 0.5                                    | 1305 |
| Cytoplasm                                        |  | 3 ± 0.4 (0.02)                             | 1378 |
|                                                  |  | Internal disordered segment (≥40 residues) |      |
|                                                  |  | yes                                        | no   |
| Nucleus                                          |  | 610                                        | 695  |
| Cytoplasm                                        |  | 496                                        | 882  |
|                                                  |  | 1106                                       | 1577 |
| <i>P</i> = 2x10 <sup>-8</sup> (chi-squared test) |  |                                            |      |
|                                                  |  | Overall disorder degree [%]                |      |
| Nucleus                                          |  | 27.3 ± 1.4                                 | 1305 |
| Cytoplasm                                        |  | 19.6 ± 1.3 (6x10 <sup>-14</sup> )          | 1378 |

**Table S1J. Removal of membrane proteins does not affect the observed trends**

| Property                           |                      | $\tilde{x} \pm \text{C.I. (Half-Life [min])}$ | n    |
|------------------------------------|----------------------|-----------------------------------------------|------|
| <b>N-terminal disorder length</b>  | Long (>30 residues)  | 35 ± 3.6                                      | 433  |
|                                    | Short (≤30 residues) | 44 ± 1.8 (3x10 <sup>-5</sup> )                | 2585 |
| <b>C-terminal disorder length</b>  | Long (>30 residues)  | 43 ± 4.9                                      | 318  |
|                                    | Short (≤30 residues) | 43 ± 1.7 (0.64)                               | 2700 |
| <b>Internal disordered segment</b> | yes (≥40 residues)   | 33 ± 2.4                                      | 1170 |
|                                    | no (<40 residues)    | 50 ± 2.4 (2x10 <sup>-29</sup> )               | 1848 |

**Table S1K. Using the Kolmogorov-Smirnov test to assess half-life differences yields equivalent results**

| Property                                                                          | <i>P</i> value        |
|-----------------------------------------------------------------------------------|-----------------------|
| <b>N-terminal disorder length</b><br>Long (>30 residues) vs. Short (≤30 residues) | 1x10 <sup>-4</sup>    |
| <b>C-terminal disorder length</b><br>Long (>30 residues) vs. Short (≤30 residues) | 0.94                  |
| <b>Internal disordered segment</b><br>yes (≥40 residues) vs. no (<40 residues)    | < 2x10 <sup>-16</sup> |

## Table S2, Related to Figures 1 and 2

**Table S2 (separate Excel file). The primary data used in this study**

This table is available as a separate Excel file.

## Table S3, Related to Table 1

**Table S3A. Extended conditional probabilities for N-terminal disorder and protein half-life**

This table is an extension to Table 1A.

| <i>Half-life</i>                                                                                                                                                                                                                                     | <b>Short (<math>\leq 30</math> min; <math>H_S</math>)</b><br>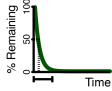 | <b>Medium (31-70 min; <math>H_M</math>)</b><br>                                                                                                                                                    | <b>Long (<math>&gt; 70</math> min; <math>H_L</math>)</b><br> | <b>Total</b> |
|------------------------------------------------------------------------------------------------------------------------------------------------------------------------------------------------------------------------------------------------------|------------------------------------------------------------------------------------------------------------------------------------------------|-------------------------------------------------------------------------------------------------------------------------------------------------------------------------------------------------------------------------------------------------------------------------------------|------------------------------------------------------------------------------------------------------------------------------------------------|--------------|
| <b><i>N-terminal disordered segment</i></b>                                                                                                                                                                                                          |                                                                                                                                                |                                                                                                                                                                                                                                                                                     |                                                                                                                                                |              |
| <b>Long (<math>&gt; 30</math> residues; <math>N_L</math>)</b><br>                                                                                                   | 210                                                                                                                                            | 158                                                                                                                                                                                                                                                                                 | 111                                                                                                                                            | 479          |
| <b>Short (<math>\leq 30</math> residues; <math>N_S</math>)</b><br>                                                                                                  | 930                                                                                                                                            | 1023                                                                                                                                                                                                                                                                                | 841                                                                                                                                            | 2794         |
| <b>Total</b>                                                                                                                                                                                                                                         | 1140                                                                                                                                           | 1181                                                                                                                                                                                                                                                                                | 952                                                                                                                                            | 3273         |
| <b>Conditional probability of observing a protein with:</b>                                                                                                                                                                                          |                                                                                                                                                |                                                                                                                                                                                                                                                                                     |                                                                                                                                                |              |
| (i) long N-terminal disorder among those that have short half-life:<br>$P(N_L   H_S) = \frac{210}{1140} = 0.18$ The low value suggests that there are factors other than long N-terminal disorder that can cause proteins to have a short half-life. |                                                                                                                                                | (i) long N-terminal disorder among those that have long half-life:<br>$P(N_L   H_L) = \frac{111}{952} = 0.12$ The low value suggests that proteins that have a long half-life are unlikely to have long N-terminal disorder.                                                        |                                                                                                                                                |              |
| (ii) short half-life among those that have long N-terminal disorder:<br>$P(H_S   N_L) = \frac{210}{479} = 0.44$ The relatively higher value suggests that proteins with long N-terminal disorder are likely to be rapidly degraded.                  |                                                                                                                                                | (ii) long half-life among those that have long N-terminal disorder:<br>$P(H_L   N_L) = \frac{111}{479} = 0.23$ This suggests that proteins with long N-terminal disorder do not usually have a long half-life, indicating that such proteins are often rapidly degraded.            |                                                                                                                                                |              |
| (i) short N-terminal disorder among those that have short half-life:<br>$P(N_S   H_S) = \frac{930}{1140} = 0.82$ This suggests that proteins with short N-terminal disorder can still be actively degraded by other mechanisms.                      |                                                                                                                                                | (i) short N-terminal disorder among those that have long half-life:<br>$P(N_S   H_L) = \frac{841}{952} = 0.88$ The high value suggests that most long-lived proteins have short N-terminal disorder.                                                                                |                                                                                                                                                |              |
| (ii) short half-life among those that have short N-terminal disorder:<br>$P(H_S   N_S) = \frac{930}{2794} = 0.33$ This suggests that proteins with short N-terminal disorder usually do not have short half-lives.                                   |                                                                                                                                                | (ii) long half-life among those that have short N-terminal disorder:<br>$P(H_L   N_S) = \frac{841}{2794} = 0.30$ This suggests that proteins with short N-terminal disorder do not necessarily have long half-life, indicating that they can still be degraded by other mechanisms. |                                                                                                                                                |              |

**Table S3B. Extended conditional probabilities for internal disorder and protein half-life**

This table is an extension to **Table 1B**.

| <i>Half-life</i>                                                                                                                                                                                                                                    | <b>Short (<math>\leq 30</math> min; <math>H_S</math>)</b><br>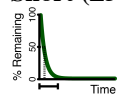 | <b>Medium (31-70 min; <math>H_M</math>)</b><br>                                                                                                                 | <b>Long (<math>&gt; 70</math> min; <math>H_L</math>)</b><br> | <b>Total</b> |
|-----------------------------------------------------------------------------------------------------------------------------------------------------------------------------------------------------------------------------------------------------|------------------------------------------------------------------------------------------------------------------------------------------------|--------------------------------------------------------------------------------------------------------------------------------------------------------------------------------------------------------------------------------------------------|-------------------------------------------------------------------------------------------------------------------------------------------------|--------------|
| <b>Internal disordered segment</b>                                                                                                                                                                                                                  |                                                                                                                                                |                                                                                                                                                                                                                                                  |                                                                                                                                                 |              |
| <b>Present (<math>\geq 40</math> residues; <math>I_p</math>)</b><br>                                                                                               | 564                                                                                                                                            | 432                                                                                                                                                                                                                                              | 264                                                                                                                                             | 1260         |
| <b>Absent (<math>&lt; 40</math> residues; <math>I_a</math>)</b><br>                                                                                                | 576                                                                                                                                            | 749                                                                                                                                                                                                                                              | 688                                                                                                                                             | 2013         |
| <b>Total</b>                                                                                                                                                                                                                                        | 1140                                                                                                                                           | 1181                                                                                                                                                                                                                                             | 952                                                                                                                                             | 3273         |
| <b>Conditional probability of observing a protein with:</b>                                                                                                                                                                                         |                                                                                                                                                |                                                                                                                                                                                                                                                  |                                                                                                                                                 |              |
| (i) an internal disordered segment among those that have short half-life:<br>$P(I_p   H_S) = \frac{564}{1140} = 0.49$ (ii) short half-life among those that have an internal disordered segment:<br>$P(H_S   I_p) = \frac{564}{1260} = 0.45$        |                                                                                                                                                | (i) an internal disordered segment among those that have long half-life:<br>$P(I_p   H_L) = \frac{264}{952} = 0.28$ (ii) long half-life among those that have an internal disordered segment:<br>$P(H_L   I_p) = \frac{264}{1260} = 0.21$        |                                                                                                                                                 |              |
| (i) no internal disordered segment among those that have short half-life:<br>$P(I_a   H_S) = \frac{576}{1140} = 0.51$ (ii) short half-life among those that do not have an internal disordered segment:<br>$P(H_S   I_a) = \frac{576}{2013} = 0.29$ |                                                                                                                                                | (i) no internal disordered segment among those that have long half-life:<br>$P(I_a   H_L) = \frac{688}{952} = 0.72$ (ii) long half-life among those that do not have an internal disordered segment:<br>$P(H_L   I_a) = \frac{688}{2013} = 0.34$ |                                                                                                                                                 |              |

## Table S4, Related to Figure 2

For information about the table content see Table S1 above.

**Table S4A. The results for internal disorder are independent of the length of N-terminal disorder of the proteins Related to Figure 2B.**

| Property                    |                                    | $\tilde{x} \pm \text{C.I. (Half-Life [min])}$ | n            |
|-----------------------------|------------------------------------|-----------------------------------------------|--------------|
| N-terminal disorder length  | <i>Internal disordered segment</i> |                                               |              |
|                             |                                    | Long (>30 residues)                           |              |
|                             | yes ( $\geq 40$ residues)          | $28.5 \pm 3.8$                                | 226          |
|                             | no (<40 residues)                  | $43 \pm 5.2 (6 \times 10^{-5})$               | 253          |
| Short ( $\leq 30$ residues) |                                    |                                               |              |
|                             |                                    | yes ( $\geq 40$ residues)                     | $35 \pm 2.1$ |
|                             | no (<40 residues)                  | $50 \pm 2.5 (2 \times 10^{-24})$              | 1760         |

**Table S4B. Function enrichment analysis of proteins with internal disordered segment(s)**

For information about the table content see Table S1F above. Background: all yeast proteins.

| Proteins with internal disordered segment(s) ( $\geq 40$ aa) (n=1260) |                                                          |                         |            |            |          |
|-----------------------------------------------------------------------|----------------------------------------------------------|-------------------------|------------|------------|----------|
| Source                                                                | Term                                                     | Term type or identifier | Percentage | Enrichment | q-value  |
| SP_PIR_KEYWORDS                                                       | phosphoprotein                                           | -                       | 74.5%      | 1.84       | 5.7e-161 |
| SP_PIR_KEYWORDS                                                       | nucleus                                                  | -                       | 41.8%      | 1.65       | 7.6e-44  |
| SP_PIR_KEYWORDS                                                       | transcription regulation                                 | -                       | 17.8%      | 2.42       | 8.8e-43  |
| SP_PIR_KEYWORDS                                                       | coiled coil                                              | -                       | 10.8%      | 2.18       | 7.3e-19  |
| GOTERM_CC_FAT                                                         | site of polarized growth                                 | GO:0030427              | 8.9%       | 2.25       | 5.1e-17  |
| GOTERM_CC_FAT                                                         | nucleoplasm part                                         | GO:0044451              | 9.2%       | 1.99       | 1.5e-12  |
| GOTERM_BP_FAT                                                         | cell cycle                                               | GO:0007049              | 18.2%      | 1.57       | 2.1e-12  |
| SP_PIR_KEYWORDS                                                       | activator                                                | -                       | 6.5%       | 2.32       | 5.8e-12  |
| GOTERM_BP_FAT                                                         | negative regulation of biosynthetic process              | GO:0009890              | 8.6%       | 1.99       | 9.1e-12  |
| KEGG_PATHWAY                                                          | Cell cycle                                               | sce04111                | 4.4%       | 2.67       | 2.9e-11  |
| SP_PIR_KEYWORDS                                                       | zinc-finger                                              | -                       | 8.2%       | 2.01       | 1.2e-10  |
| GOTERM_MF_FAT                                                         | RNA polymerase II transcription factor activity          | GO:0003702              | 6.0%       | 2.15       | 9.3e-10  |
| GOTERM_BP_FAT                                                         | chromosome organization                                  | GO:0051276              | 12.0%      | 1.68       | 1.3e-09  |
| GOTERM_BP_FAT                                                         | transcription, DNA-dependent                             | GO:0006351              | 8.0%       | 1.90       | 2.6e-09  |
| INTERPRO                                                              | Zinc finger, C2H2-like                                   | IPR015880               | 2.9%       | 3.07       | 6.3e-09  |
| SP_PIR_KEYWORDS                                                       | DNA binding                                              | -                       | 5.2%       | 2.24       | 2.7e-08  |
| GOTERM_CC_FAT                                                         | chromosome                                               | GO:0005694              | 10.6%      | 1.68       | 4e-08    |
| SP_PIR_KEYWORDS                                                       | repressor                                                | -                       | 4.0%       | 2.53       | 4.9e-08  |
| GOTERM_BP_FAT                                                         | cytoskeleton organization                                | GO:0007010              | 7.5%       | 1.83       | 2.7e-07  |
| GOTERM_BP_FAT                                                         | cytokinesis                                              | GO:0000910              | 4.6%       | 2.20       | 3.1e-07  |
| GOTERM_BP_FAT                                                         | mitotic cell cycle                                       | GO:0000278              | 9.5%       | 1.67       | 6.4e-07  |
| GOTERM_BP_FAT                                                         | intracellular signaling cascade                          | GO:0007242              | 6.0%       | 1.90       | 2.6e-06  |
| GOTERM_MF_FAT                                                         | lipid binding                                            | GO:0008289              | 3.7%       | 2.28       | 6e-06    |
| GOTERM_BP_FAT                                                         | growth                                                   | GO:0040007              | 5.1%       | 1.99       | 6.3e-06  |
| GOTERM_BP_FAT                                                         | regulation of cell cycle                                 | GO:0051726              | 6.1%       | 1.86       | 6.5e-06  |
| GOTERM_CC_FAT                                                         | plasma membrane part                                     | GO:0044459              | 5.8%       | 1.85       | 2.8e-05  |
| GOTERM_MF_FAT                                                         | specific RNA polymerase II transcription factor activity | GO:0003704              | 2.7%       | 2.51       | 4.1e-05  |
| GOTERM_CC_FAT                                                         | incipient cellular bud site                              | GO:0000131              | 2.3%       | 2.79       | 5.2e-05  |
| GOTERM_MF_FAT                                                         | transcription activator activity                         | GO:0016563              | 3.0%       | 2.32       | 9.5e-05  |
| GOTERM_BP_FAT                                                         | positive regulation of transcription                     | GO:0045941              | 5.7%       | 1.80       | 0.00012  |
| SP_PIR_KEYWORDS                                                       | serine/threonine-protein kinase                          | -                       | 3.9%       | 2.07       | 0.00027  |
| SP_PIR_KEYWORDS                                                       | sh3 domain                                               | -                       | 1.3%       | 3.78       | 0.00034  |
| SP_PIR_KEYWORDS                                                       | ATP                                                      | -                       | 6.4%       | 1.71       | 0.00037  |
| GOTERM_CC_FAT                                                         | transcription factor complex                             | GO:0005667              | 3.0%       | 2.24       | 0.00057  |
| GOTERM_BP_FAT                                                         | histone modification                                     | GO:0016570              | 3.7%       | 2.02       | 0.00091  |
| GOTERM_MF_FAT                                                         | enzyme activator activity                                | GO:0008047              | 3.7%       | 1.96       | 0.002    |
| INTERPRO                                                              | SANT, DNA-binding                                        | IPR001005               | 1.2%       | 3.63       | 0.002    |

|                 |                                  |            |      |      |        |
|-----------------|----------------------------------|------------|------|------|--------|
| GOTERM_BP_FAT   | response to osmotic stress       | GO:0006970 | 3.7% | 1.94 | 0.0026 |
| KEGG_PATHWAY    | Endocytosis                      | sce04144   | 1.4% | 3.26 | 0.0033 |
| GOTERM_MF_FAT   | transcription repressor activity | GO:0016564 | 2.2% | 2.36 | 0.005  |
| GOTERM_BP_FAT   | Ras protein signal transduction  | GO:0007265 | 1.7% | 2.70 | 0.0055 |
| KEGG_PATHWAY    | Meiosis                          | sce04113   | 3.3% | 1.96 | 0.0071 |
| SP_PIR_KEYWORDS | ubl conjugation pathway          | -          | 3.8% | 1.89 | 0.0078 |

---

## Table S5, Related to Figure 3

For information about the table content see **Table S1** above.

### Table S5. Summary of boxplot parameters and significance estimates for the effects of disordered segments on protein turnover in mouse and human

Note that the scale for protein half-life is in hours for mouse, rather than minutes as in yeast. Mouse values are half-lives, while human values are relative degradation rates. Thus, values are reversed for the human data: proteins with a short half-life have a high relative degradation rate and the other way around.

| Property                           |                      | $\tilde{x} \pm \text{C.I.}$         | n    |
|------------------------------------|----------------------|-------------------------------------|------|
| <i>Mouse</i>                       |                      | <b>Half-Life [h]</b>                |      |
| <b>N-terminal disorder length</b>  | Long (>30 residues)  | 43 ± 2.9                            | 717  |
|                                    | Short (≤30 residues) | 49.5 ± 1.7 (5x10 <sup>-5</sup> )    | 3785 |
| <b>C-terminal disorder length</b>  | Long (>30 residues)  | 44.5 ± 3.2                          | 624  |
|                                    | Short (≤30 residues) | 49 ± 1.7 (6x10 <sup>-2</sup> )      | 3878 |
| <b>Internal disordered segment</b> | yes (≥40 residues)   | 36.5 ± 1.6                          | 1626 |
|                                    | no (<40 residues)    | 57.5 ± 2.3 (6x10 <sup>-51</sup> )   | 2876 |
| <i>Human</i>                       |                      | <b>Relative degradation rate</b>    |      |
| <b>N-terminal disorder length</b>  | Long (>30 residues)  | -0.04 ± 0.07                        | 658  |
|                                    | Short (≤30 residues) | -0.24 ± 0.03 (9x10 <sup>-8</sup> )  | 3313 |
| <b>C-terminal disorder length</b>  | Long (>30 residues)  | -0.05 ± 0.07                        | 625  |
|                                    | Short (≤30 residues) | -0.23 ± 0.03 (7x10 <sup>-7</sup> )  | 3346 |
| <b>Internal disordered segment</b> | yes (≥40 residues)   | 0.09 ± 0.05                         | 1493 |
|                                    | no (<40 residues)    | -0.37 ± 0.03 (4x10 <sup>-65</sup> ) | 2478 |



## Table S6, Related to Figure 4

For information about the table content see **Table S1** above.

### Table S6A. Divergence of N-terminal or internal disordered segments is linked to protein half-life changes during evolution

Related to **Figures 4B, 4C** and **S4A**.

‘SS & LL’ refers to paralog pairs where both proteins have the same type of terminal disorder, short (S) or long (L). ‘SL’ refers to divergent paralog pairs, where one protein has a short (S) and the other a long (L) disordered terminus. ‘ $\Delta I = 0$ ’ refers to paralog pairs with identical numbers of internal disordered segments. ‘ $\Delta I \geq 1$ ’ refers to paralog pairs where one of the two paralogs has a higher number of internal disordered segments. IL refers to the total number of residues that make up all internal disordered segments. See the **Supplemental Experimental Procedures** for details.

| Property                                          |                                                                         | $\tilde{x} \pm C.I.$                    | n    |
|---------------------------------------------------|-------------------------------------------------------------------------|-----------------------------------------|------|
| <b>N-terminus</b>                                 |                                                                         |                                         |      |
| N-terminal disorder length difference $\Delta L$  | SS & LL                                                                 | $\Delta H$ [min]<br>$-2 \pm 3.4$        | 1049 |
|                                                   | SL                                                                      | $-14 \pm 6.6 (9 \times 10^{-6})$        | 391  |
| Half-life difference $\Delta H$                   | $\leq 0$ min                                                            | $\Delta L$ [# residues]<br>$12 \pm 3.5$ | 804  |
|                                                   | $> 0$ min                                                               | $8 \pm 1.6 (1 \times 10^{-5})$          | 636  |
| <b>C-terminus</b>                                 |                                                                         |                                         |      |
| C-terminal disorder length difference $\Delta L$  | SS & LL                                                                 | $\Delta H$ [min]<br>$7 \pm 3.2$         | 1154 |
|                                                   | SL                                                                      | $-5.5 \pm 7.5 (3 \times 10^{-3})$       | 286  |
| Half-life difference $\Delta H$                   | $\leq 0$ min                                                            | $\Delta L$ [# residues]<br>$5 \pm 1.5$  | 658  |
|                                                   | $> 0$ min                                                               | $4 \pm 0.8 (0.67)$                      | 782  |
| <b>Internal</b>                                   |                                                                         |                                         |      |
| Internal disordered regions difference $\Delta I$ | (a) $\Delta I = 0$ ;<br>$\Delta H = H_1 - H_2$ , where $IL_1 \leq IL_2$ | $\Delta H$ [min]<br>$4 \pm 4.1$         | 879  |
|                                                   | (b) $\Delta I = 0$ ;<br>$\Delta H = H_1 - H_2$ , where $IL_1 \geq IL_2$ | $-5 \pm 4 (2 \times 10^{-5})$           | 879  |
|                                                   | (c) $\Delta I \geq 1$                                                   | $-7 \pm 4.1 (1 \times 10^{-5})$         | 561  |

**Table S6B. Approximate permutation tests for N-terminal disorder in paralog pairs**

This table shows the results of four separate approximate permutation analyses, focused on the effect on half-life of changes in N-terminal disorder between pairs of paralogs (**Supplemental Experimental Procedures**). Averaged medians resulting from 1000 random permutations of the length of N-terminal disorder, protein half-lives, both, or random assignments of paralog pairs from BLASTClust singletons (those proteins lacking a paralog in yeast) are shown. The other properties were kept intact in each case, while the randomized property was drawn from its distribution without replacement. The *P* values reported here are equal to the fraction of Mann-Whitney *U* tests that gave a lower or identical *P* value to the one observed in the real data (**Figure 4** and **Table S6A**). A significant *P* value here indicates that our findings are not likely to have been observed by chance. ‘SS & LL’ refers to paralog pairs where both proteins have the same type of terminal disorder, short (S) or long (L). ‘SL’ refers to divergent paralog pairs, where one protein has a short (S) and the other a long (L) disordered terminus.

| Randomly assigned property                          |              | Average of medians                | Permutations |
|-----------------------------------------------------|--------------|-----------------------------------|--------------|
| <b>N-terminal disordered regions</b>                |              |                                   |              |
| N-terminal disorder length difference $\Delta L$    | SS & LL      | $\Delta H$ [min]<br>0.187         | 1000         |
|                                                     | SL           | 0.106 ( $3 \times 10^{-2}$ )      |              |
| Half-life difference $\Delta H$                     | $\leq 0$ min | $\Delta L$ [# residues]<br>9.073  | 1000         |
|                                                     | $> 0$ min    | 8.875 ( $4 \times 10^{-3}$ )      |              |
| <b>Half-lives</b>                                   |              |                                   |              |
| N-terminal disorder length difference $\Delta L$    | SS & LL      | $\Delta H$ [min]<br>0.150         | 1000         |
|                                                     | SL           | -0.255 ( $4 \times 10^{-2}$ )     |              |
| Half-life difference $\Delta H$                     | $\leq 0$ min | $\Delta L$ [# residues]<br>9.95   | 1000         |
|                                                     | $> 0$ min    | 9.904 ( $1 \times 10^{-2}$ )      |              |
| <b>N-terminal disordered regions and half-lives</b> |              |                                   |              |
| N-terminal disorder length difference $\Delta L$    | SS & LL      | $\Delta H$ [min]<br>-0.049        | 1000         |
|                                                     | SL           | 0.118 ( $4 \times 10^{-2}$ )      |              |
| Half-life difference $\Delta H$                     | $\leq 0$ min | $\Delta L$ [# residues]<br>9.917  | 1000         |
|                                                     | $> 0$ min    | 9.872 ( $8 \times 10^{-3}$ )      |              |
| <b>Paralog pairs from singletons</b>                |              |                                   |              |
| N-terminal disorder length difference $\Delta L$    | SS & LL      | $\Delta H$ [min]<br>-1.321        | 1000         |
|                                                     | SL           | -3.385 ( $< 1 \times 10^{-3}$ )   |              |
| Half-life difference $\Delta H$                     | $\leq 0$ min | $\Delta L$ [# residues]<br>10.201 | 1000         |
|                                                     | $> 0$ min    | 9.183 ( $< 1 \times 10^{-3}$ )    |              |

**Table S6C. Function enrichment analysis of paralog pairs that diverged in N-terminal or internal disordered segments**

For information about the table content see **Table S1F** above. Background: paralogous proteins in yeast (see **Supplemental Experimental Procedures**).

| <b>Proteins in paralog pairs where N-terminal disorder length diverged (short &amp; long) (n=251 unique proteins in 391 pairs)</b> |                                            |                         |            |            |         |
|------------------------------------------------------------------------------------------------------------------------------------|--------------------------------------------|-------------------------|------------|------------|---------|
| Source                                                                                                                             | Term                                       | Term type or identifier | Percentage | Enrichment | q-value |
| SP_PIR_KEYWORDS                                                                                                                    | serine/threonine-protein kinase            | -                       | 14.7%      | 3.82       | 6.6e-11 |
| INTERPRO                                                                                                                           | Helicase, superfamily 1 and 2, ATP-binding | IPR014021               | 8.4%       | 4.80       | 2.3e-07 |
| GOTERM_MF_FAT                                                                                                                      | RNA helicase activity                      | GO:0003724              | 6.8%       | 4.43       | 7.8e-05 |
| INTERPRO                                                                                                                           | Amino acid permease, fungi                 | IPR004762               | 4.4%       | 5.34       | 0.005   |

| <b>Proteins in paralog pairs that diverged in the number of internal disordered segments (n=369 unique proteins in 561 pairs)</b> |                               |                         |            |            |         |
|-----------------------------------------------------------------------------------------------------------------------------------|-------------------------------|-------------------------|------------|------------|---------|
| Source                                                                                                                            | Term                          | Term type or identifier | Percentage | Enrichment | q-value |
| SP_PIR_KEYWORDS                                                                                                                   | ATP                           | -                       | 17.3%      | 2.48       | 7.7e-11 |
| SP_PIR_KEYWORDS                                                                                                                   | phosphoprotein                | -                       | 65.3%      | 1.35       | 8.9e-10 |
| SP_PIR_KEYWORDS                                                                                                                   | ubl conjugation pathway       | -                       | 5.4%       | 4.07       | 5.2e-06 |
| SP_PIR_KEYWORDS                                                                                                                   | nucleotide binding            | -                       | 10.0%      | 2.60       | 9.8e-06 |
| KEGG_PATHWAY                                                                                                                      | Cell cycle                    | sce04111                | 6.0%       | 3.41       | 2.3e-05 |
| GOTERM_BP_FAT                                                                                                                     | cell division                 | GO:0051301              | 13.0%      | 1.97       | 0.0012  |
| GOTERM_BP_FAT                                                                                                                     | response to organic substance | GO:0010033              | 8.1%       | 2.33       | 0.0052  |

**Table S7, Related to Figure 4**

**Table S7 (separate Excel file). Data on N-terminal disordered regions, internal disordered regions, and half-life for paralog pairs**

This table is available as a separate Excel file.

## Table S8, Related to Table 2

**Table S8A. Extended conditional probabilities for N-terminal disorder and protein half-life in pairs of paralogs**  
This table is an extension to Table 2A.

|                                                                                                                                                                                                                                                                                                                                                                                                                                                                                                  | Negative half-life difference<br>( $\Delta H < 0$ min) | Positive half-life difference<br>( $\Delta H > 0$ min) | Total (including $\Delta H = 0$ min) |
|--------------------------------------------------------------------------------------------------------------------------------------------------------------------------------------------------------------------------------------------------------------------------------------------------------------------------------------------------------------------------------------------------------------------------------------------------------------------------------------------------|--------------------------------------------------------|--------------------------------------------------------|--------------------------------------|
| <b>Short-short(SS) &amp; Long-long(LL)</b><br>similar                                                                                                                                                                                                                                                                                                                                                           | 535                                                    | 501                                                    | 1049                                 |
| <b>Short-long(SL)</b><br>divergent                                                                                                                                                                                                                                                                                                                                                                              | 252                                                    | 135                                                    | 391                                  |
| <b>Total</b>                                                                                                                                                                                                                                                                                                                                                                                                                                                                                     | 787                                                    | 636                                                    | 1440                                 |
| <b>Conditional probability of observing a paralogous pair with:</b>                                                                                                                                                                                                                                                                                                                                                                                                                              |                                                        |                                                        |                                      |
| (i) negative half-life difference among all pairs where one paralog has long, the other short N-terminal disorder:<br>$P(\Delta H < 0 \text{ min}   N_{SL}) = \frac{252}{391} = 0.64$ <p>The relatively high value suggests that paralogous pairs that have diverged the length of their N-terminal disorder are likely to have altered half-life in a manner that is consistent with the reported observation (i.e. proteins with longer terminal disorder tend to have shorter half-life).</p> |                                                        |                                                        |                                      |
| (ii) one long, one short disorder N-terminus among all pairs with negative half-life difference:<br>$P(N_{SL}   \Delta H < 0 \text{ min}) = \frac{252}{787} = 0.32$ <p>The relatively low value suggests that regulatory mechanisms other than divergence in N-terminal disorder control the turnover of individual proteins after gene duplication.</p>                                                                                                                                         |                                                        |                                                        |                                      |

**Table S8B. Extended conditional probabilities for internal disorder and protein half-life in pairs of paralogs**  
This table is an extension to Table 2B.

IL refers to the total number of residues that make up all internal disordered segments.  $I_{n \rightarrow n+x}$  denotes pairs where one of the two paralogs has a higher number of internal disordered segments ( $\Delta I \geq 1$ ). See the **Supplemental Experimental Procedures** for details.

|                                                                                                                                                                                                                                                                                                    | Negative half-life difference<br>( $\Delta H < 0$ min)    | Positive half-life difference<br>( $\Delta H > 0$ min)    | Total (including $\Delta H = 0$ min) |
|----------------------------------------------------------------------------------------------------------------------------------------------------------------------------------------------------------------------------------------------------------------------------------------------------|-----------------------------------------------------------|-----------------------------------------------------------|--------------------------------------|
| <b>Identical number of internal disordered segments (<math>\Delta I = 0</math>)</b><br>paralog pair <br>ancestral protein    | 476<br>( $\Delta H = H_1 - H_2$ , with $IL_1 \geq IL_2$ ) | 391<br>( $\Delta H = H_1 - H_2$ , with $IL_1 \geq IL_2$ ) | 879                                  |
| <b>Diverged number of internal disordered segments (<math>\Delta I \geq 1</math>)</b><br>paralog pair <br>ancestral protein  | 323                                                       | 233                                                       | 561                                  |
| <b>Total</b>                                                                                                                                                                                                                                                                                       | 799                                                       | 624                                                       | 1440                                 |
| <b>Conditional probability of observing a paralogous pair with:</b>                                                                                                                                                                                                                                |                                                           |                                                           |                                      |
| (i) negative half-life difference among all pairs where one paralog has more internal disordered segments than the other:<br>$P(\Delta H < 0 \text{ min}   I_{n \rightarrow n+x}) = \frac{323}{561} = 0.58$                                                                                        |                                                           |                                                           |                                      |
| (ii) pairs with a diverged number of internal disordered segments among all pairs with negative half-life difference:<br>$P(I_{n \rightarrow n+x}   \Delta H < 0 \text{ min}) = \frac{323}{799} = 0.40$                                                                                            |                                                           |                                                           |                                      |

## SUPPLEMENTAL RESULTS

### Results S1. The effects of disordered segments on half-life are independent of the overall disorder degree (extended)

The fraction of disordered residues (i.e. overall degree of disorder), which is an estimate of the packing, folding and structural stability of a protein, by itself correlates with protein half-life, although previous studies disagree on the extent of the effect (Gsponer et al., 2008; Tompa et al., 2008; Yen et al., 2008). Proteins with a greater overall disorder degree generally contain longer terminal and internal disordered segments (**Figure S3A**). To determine whether the effects of continuous stretches of disordered residues (i.e. disordered segments) on protein turnover (**Figures 1 and 2**) are independent of the overall degree of disorder, we matched proteins that have a similar fraction of disordered residues but have varying combinations of disordered segments (long or short N-terminal disorder and/or presence or absence of internal disordered segments; **Figure S3B**).

For each protein with a long N-terminal disordered segment that also has a long internal disordered segments ( $N_L I_p$ , 226 cases, the minority class) we selected one protein from each of the other classes that is closest to the  $N_L I_p$  protein in terms of the overall disorder degree (i.e. fraction of disordered residues across the full protein). This yields combinations of proteins from different classes ( $N_L I_p - N_S I_p - N_L I_a - N_S I_a$ ) with almost identical overall degrees of disorder (**Figure S3B**). R values between the overall disorder degree of pairs of proteins from various classes are  $\sim 1$  (almost perfect linear correlation), demonstrating that paired proteins selected using the above method indeed have almost identical overall degrees of disorder. Comparison of the half-lives of proteins from different classes with similar overall disorder degrees (**Figure S3C**) reveals similar trends as the analysis that uses all proteins (**Figure 2D**). Proteins with both long N-terminal and internal disordered segments ( $N_L I_p$ ) typically have the shortest half-lives, independent of whether all proteins are considered, or only proteins with highly similar overall disorder degree. Then come proteins with either long internal ( $N_S I_p$ ), or long N-terminal disordered segments ( $N_L I_a$ ). Proteins with no long disordered segments ( $N_S I_a$ ) typically have the longest half-lives.

The effect sizes of the differences between the half-life distributions are comparable when proteins are grouped based on the overall degree of disorder or when all proteins are considered (**Figure S3D**, upper triangles). Furthermore, most half-life distributions are significantly different, though  $P$  values for proteins grouped by overall disorder degree are less significant than when using all proteins due to smaller sample sizes (**Figure S3D**, lower triangles). Alternative comparison of proteins by the number of internal disordered segments (**Figures S3I, S3J and S3K**), and divided into structural classes based on the scores of the various disorder predictors (**Figures S1C, S1D, S2A and S2B**) confirms that the observed effects are independent of the overall degree of disorder. These results indicate that long disordered segments (continuous stretches of disordered residues) at the N-terminus or internally contribute to shorter protein half-life in living cells, and that this effect is independent of the fraction of disordered residues across the whole protein. It should however be noted that this does not rule out an additional effect of the overall degree of disorder on protein half-life, i.e. among proteins that do or do not have a disordered segment, proteins with higher degrees of overall disorder tend to have a lower half-life compared to those with a lower degree of disorder (see **Discussion** in the main text).

#### *Comparing individual classes of proteins with disordered segments*

We also compared the individual classes of proteins with disordered segments ( $N_L I_p$ ,  $N_S I_p$ , or  $N_L I_a$ ) to proteins without any such segments ( $N_S I_a$ ). For that, we paired each  $N_S I_a$  protein with a protein from each of the other classes that has the closest overall degree of disorder (making  $N_L I_a - N_S I_a$ ,  $N_S I_p - N_S I_a$ , and  $N_L I_p - N_S I_a$  pairs, **Figure S3E and S3F**). This is different from the approach above, which makes combinations of  $N_L I_p - N_S I_p - N_L I_a - N_S I_a$  proteins. We then compared the half-lives. One confounding factor in the approach for pairing proteins with disordered segments to proteins with no disordered segments ( $N_S I_a$ ) based on the overall disorder degree, is that a  $N_S I_a$  protein can be sampled more than once if it happens to be closest in terms of overall disorder degree to multiple proteins with disordered segments. This effect is most pronounced in the  $N_S I_p - N_S I_a$  and  $N_L I_p - N_S I_a$  pairs (**Figure S3G**), but does not seem to be a problem since many  $N_S I_a$  proteins occur few (more than once, but not very often) times, rather than there being very few  $N_S I_a$  proteins that account for very many of the data points. E.g. in the  $N_S I_p - N_S I_a$  pairs, 10.2% of the non-unique proteins account for 34.6% of all data points, and in the  $N_L I_p - N_S I_a$  pairs, 9.6% of the non-unique proteins account for 27.8% of all data points. None of the three pairings have a single or a couple of proteins that are present an extreme number of times (**Figure S3G**, 'Maximal occurrences' column).

Nevertheless, to control for potential biases caused by having duplicate data points in the group of proteins with no disordered segment, we randomly removed protein pairs containing a multiple-occurring  $N_S I_a$  protein, until individual proteins occur only once. We then calculated effect sizes and statistical differences between half-life distributions of proteins with and without disordered segments as before. The procedure was repeated 1000 times to estimate the robustness of the results. The means and medians of the resulting effect sizes (difference in median half-life) are close to the original values for  $N_L I_a - N_S I_a$  and  $N_L I_p - N_S I_a$  (**Figure S3H**). The effect sizes for the  $N_S I_p - N_S I_a$  comparison differ a lot more between the analysis that includes multiple-occurring  $N_S I_a$  proteins (**Figure S3F**), and the analysis that excludes such duplicates (**Figure S3H**): not a single of the 1000  $N_S I_p - N_S I_a$  sets results in an effect size that is as big (28 minutes)

as the set that includes duplicates. This has likely to do with the larger number of duplicates in the  $N_S I_p - N_S I_a$  comparison than in  $N_L I_a - N_S I_a$  and  $N_L I_p - N_S I_a$  (**Figure S3G**). Importantly, however, the effect sizes of the comparisons without duplicates are in all cases very similar to the values when using all data, i.e. not combined by disorder degree similarity (minimally 8.5 min. for  $N_L I_a - N_S I_a$ , 14 min. for  $N_S I_p - N_S I_a$ , 27 min. for  $N_L I_p - N_S I_a$  - **Figure S3H** - compared to the upper triangle of the 'All proteins' part of **Figure S3D** - 7, 15, and 22 min., respectively).

The  $P$  values are generally less significant due to a reduction in the number of data points (**Figure S3H**). About three quarters of the 1000 generated  $N_S I_a$  sets for the  $N_L I_a - N_S I_a$  pairing have significantly higher half-life distributions than the corresponding  $N_L I_a$  set at a confidence level of 5%. The smallest effect size is still 8.5 minutes, which is substantial in the context of the yeast cell cycle and comparable to the difference found in the original comparison of half-lives between proteins with long and short N-terminal disordered segments (**Figure 1**, 9 minutes). Furthermore, all 1000 tested  $N_S I_a$  sets in the  $N_S I_p - N_S I_a$  and  $N_L I_p - N_S I_a$  pairings have significantly longer half-lives compared to the paired proteins with a disordered segment, with large effect sizes (**Figure S3H**). Together, these results again indicate that presence of disordered segments leads to shorter protein half-life and that this is likely to be independent of the overall degree of disorder.

Our approach for selecting protein pairs with similar overall disorder degree made sure that the differences between the overall disorder degrees of the individual proteins are fully controlled for (**Figure S3B** and **S3E**). We did however ask how often, within the protein pairs with similar overall disorder degree, the protein with a disordered segment ( $N_L I_p$ ,  $N_S I_p$ , or  $N_L I_a$ ) has the highest fraction of disordered residues and the protein without a disordered segment ( $N_S I_a$ ) the lowest, because if the proteins with a disordered segment always have the higher overall disorder degree, then overall disorder degree might still be the cause of their shorter half-life (even though this is highly unlikely due to the negligible differences in overall disorder degree between protein pairs). In all three pairings, the percentage of pairs where the protein with a disordered segment has the higher overall disorder value compared to the  $N_S I_a$  protein is close to 50%, being 44.7% ( $N_L I_a$ ), 48.1% ( $N_S I_p$ ), and 53.5% ( $N_L I_p$ ). Therefore, we can discard biases towards higher overall disorder degree values in proteins with disordered segment as a possible reason for why these proteins typically have shorter half-lives compared to proteins without such segments.

## Results S2. The results are independent of known degradation signals

Aside from ubiquitination, several signals have been shown to regulate protein degradation. For example, short sequence motifs, such as the destruction box and the KEN box act as recognition surfaces for ubiquitin ligases and thereby signal for the destruction of specific proteins, mostly involved in the cell cycle (Pfleger and Kirschner, 2000). Another feature of proteins that has been proposed to lead to rapid degradation is the presence of regions that are enriched in proline, glutamic acid, serine, and threonine residues (PEST regions), although the mechanism is unknown (Rogers et al., 1986). To investigate if the effects of disordered segments on protein half-life could be explained by the presence of such destruction signals, we collected data describing the presence of four known signals: experimentally determined ubiquitination sites, KEN box motifs, destruction box motifs, and PEST sequence regions. Experimentally determined ubiquitination sites were obtained from UniProtKB/Swiss-Prot release 2011\_04 (Uniprot-Consortium, 2011). PEST regions were predicted using epestfind with default parameters, as included in EMBOSS 6.5.7 (Rice et al., 2000). Matches marked as "potential" were included, while lowest-confidence "poor" matches were excluded. KEN box and destruction box motifs were predicted using GPS-ARM 1.0 with default parameters (Liu et al., 2012). When determining overlap between a motif and a disordered region, partial overlap was considered sufficient.

Only 13% of experimentally determined yeast ubiquitination sites fall into the long terminal or internal disordered segments examined in our study. Similarly, only 28% of predicted KEN box motifs, 24% of destruction box motifs, and 45% of PEST sequences fall into these disordered segments. Furthermore, more than half (56% of all proteins, 54% of proteins with short half-life) of the proteins with long terminal or internal disordered segments do not contain a single destruction signal (experimentally determined ubiquitination sites, KEN box, destruction box, or PEST sequence) in these disordered segments. This number is conservative since many of the predicted motifs will not be biologically relevant, and because it describes the presence of any of these destruction signals. The fraction of proteins with no individual destruction signals in the long terminal or internal disordered segments is much higher: 99% for ubiquitination sites, 93% for KEN box, 90% for destruction box, and 66% for PEST regions. Consistent with this, the distributions of half-lives of proteins with and without predicted destruction signals within the disordered regions were not significantly different ( $P = 0.1$  for N-terminal disorder;  $P = 0.2$  for internal disorder; Mann-Whitney  $U$  test; data not shown). Finally, the probability that a protein has a short half-life, given that it has a long terminal or internal disordered segment is similar regardless of whether we consider the presence of destruction signals in the whole protein (0.39) or not (0.43, **Table 1C**). These results indicate that many disordered segments examined in our study contain no predicted destruction motifs or experimentally determined ubiquitination sites that could explain the effects of these segments on protein half-life. Thus, the short half-life of proteins with long disordered segments is likely due to the direct effects of these segments on proteasomal degradation, rather than due to indirect effects by incorporating destruction signals.

### Results S3. Disordered segments of proteins with short half-life lack enriched, uncharacterized sequence motifs that could explain the rapid degradation

We have shown that the effects of disordered segments on protein half-life are unlikely to result from the presence of known destruction signals (ubiquitination sites, KEN box, destruction box, or PEST sequence) in these regions (**Supplemental Results S2**). Another possible explanation for the short half-life of proteins with long disordered segments is that these segments are enriched for uncharacterized sequence patterns such as short linear motifs (SLiMs) (Davey et al., 2012) that confer susceptibility to rapid degradation. These hypothetical motifs could represent novel protein degradation biology as they might facilitate for example interaction with the proteasome or serve as docking motifs for ubiquitin ligases, leading to faster turnover. To discover such uncharacterized motifs that might be responsible for the effects of disordered regions on protein degradation, we used SLiMFinder (Davey et al., 2010) and DiliMot (Neduva et al., 2005) to analyze the amino acid sequences of long N-terminal disordered segments (210 sequences in 210 proteins) and long internal disordered segments (999 sequences in 564 proteins) of proteins with short half-life (half-life  $\leq 30$  minutes).

SLiMFinder uses BLAST (Altschul et al., 1990) to identify short linear motifs that are shared by unrelated proteins. We used SLiMFinder version 4.5 with the following settings (parameters that are not reported were set with default values):

- dismask=F. We chose not to mask structured regions as we preferred to rely on the definitions of disordered and structured protein regions by DISOPRED2 used in our other analyses (**Supplemental Experimental Procedures**), which were already used to select sequences in which to search for over-represented motifs (i.e. only the sequences of long disordered regions of proteins with short half-lives were searched).
- ftmask=F. The whole sequence corresponding to a disordered region was considered for searching motifs, rather than masking parts of the sequences that correspond to annotated uniprot features such as transmembrane helices and protein domains.
- compmask=5,8. Prevents the detection of low-complexity repeat-like motifs, such as poly-Q stretches, which are common in disordered regions (Jorda et al., 2010; Simon and Hancock, 2009).
- metmask=T/F. This mask is activated for the detection of motifs in N-terminal disordered regions, because artefactual motifs starting with a methionine were reported otherwise. The mask is disabled, however, for internal disordered sequences.
- consmask=F. Less conserved parts of the sequences were not masked as we considered the whole sequence corresponding to a disordered segment for searching motifs.
- posmask=F. We have no reason to assume over-representation of certain position-specific amino acids. For example, we found no enrichment of alanines after the N-terminal initiator methionine in the N-terminal disordered sequences analyzed for motifs.
- slimlen=10. Annotated instances of short linear motifs are usually 3-10 amino acids long (Davey et al., 2012; Dinkel et al., 2012).
- maxwild=3. The vast majority (>90%) of consecutive wildcard positions in definitions of known motif classes in the ELM database (Dinkel et al., 2012) are up to three residues in length.

The motif KR.[DE] occurs 27 times in 201 sequence clusters of long N-terminal disordered segments from proteins with short half-life ( $P_{corrected} = 3.9 \times 10^{-2}$ , enrichment after Bonferroni-like correction for testing multiple motifs). SLiMFinder also detects 25 occurrences of the overlapping motif L.{0,1}KR (which itself is not significantly enriched,  $P_{corrected} = 5.7 \times 10^{-2}$ ). Together, these two motifs are present in 39 of 210 (~19%) long N-terminal disordered segments of short-lived proteins, which means that the majority of such regions (more than 80%) do not contain the enriched motifs.

Long internal disordered segments from proteins with short half-life are enriched for several groups of motifs composed of short and simple overlapping instances (typically three residues in length with all positions defined, i.e. no wildcard positions). They contain largely positively charged motifs (e.g. KRK), serine/proline-rich motifs (e.g. SLP), and several singular motifs such as the negatively charged DEE motif. These motifs are in agreement with the general sequence preferences of disordered regions: enrichment for charged and polar amino acids and depletion of hydrophobic amino acids (Romero et al., 2001). Thus, these motifs seem to reflect general sequence characteristics of protein disorder rather than being sequences that for example regulate specific interactions between the proteasome and its substrates. Furthermore, combined, the enriched motifs are present in the internal disordered segments of 462 of 999 proteins with short half-life (~46%), which again shows that most short-lived proteins do not even contain the enriched motifs in their disordered segments.

DiliMot (Neduva et al., 2005) did not detect any enriched motif for either long N-terminal or internal disordered sequences of short-lived proteins. DiliMot was set to detect motifs that are fixed in at least two positions (L parameter), could be up to 10 residues in length (W parameter), and occur in at least three of the sequences searched. We tried various combinations of settings: removing or keeping parts of the sequence that (i) overlap with known domains and (ii) show similarity with other sequences in the set, using or not using information on evolutionary conservation based on (i) only other yeast species or (ii) all available species including species that are distant from *Saccharomyces cerevisiae* such as human and mouse.

Taken together, sequence analysis indicates that the majority of long disordered segments from proteins with short half-lives lack enriched, uncharacterized sequence motifs that could facilitate degradation. Furthermore, even the identified motifs that are enriched in the disordered sequences of short-lived proteins are unlikely to represent uncharacterized degradation motifs but rather reflect the general sequence properties of disordered regions. However, different subtypes of protein disorder exist, that could each have a different effect of protein half-life: some types might be able to interact with the proteasome to speed up degradation, while others might not (see **Discussion** in the main text). The broad distributions of half-lives observed in our study support this idea as they reflect the combined properties of many possible subtypes of disordered segments, some of which are able to efficiently initiate degradation, while others may not.

#### **Results S4. Paralogous pairs with a negative half-life change have larger divergence in the length of N-terminal disorder**

Paralogous proteins pairs that during evolution diverged in the length of the N-terminal disordered segments generally show changes in half-life in a manner that is in agreement with the relationship that is reported in the main text: the protein of a paralogous pair with longer N-terminal disorder usually has a shorter half-life compared with its paralog (**Figure 4B**).

We also calculated, for every pair of paralogs, the difference in the half-life of the proteins. Pairs where the paralog with the longer disordered N-terminus has the shorter half-life of the two are assigned to one group ( $\Delta H \leq 0$  minutes), whereas pairs where the paralog with the longer disordered N-terminus has the longer half-life ( $\Delta H > 0$  minutes) are assigned to the other group. Consistently, we find that paralogous pairs with a negative half-life change show significantly larger divergence in the length of N-terminal disorder ( $P = 1 \times 10^{-5}$ , Mann-Whitney  $U$  test, **Figure S4A**). This means that if the half-life of two paralogous proteins differs in a manner that is in agreement with the previous observations (i.e. longer disordered terminus, shorter half-life), then the changes in the length of N-terminal disorder are generally much bigger compared to paralogs that differ in their half-lives the other way around. Thus, it appears that divergence in N-terminal disorder does indeed result in a change in half-life of paralogous proteins in a manner consistent with what is reported in the main text.

#### **Results S5. The reported trends are independent of confounding factors**

We performed a number of control calculations to ensure that the observations are independent of confounding factors. The findings are independent of the method used to predict intrinsic disorder in proteins: the DISOPRED2 calculations were repeated using two alternative methods, IUPred and PONDR VSL1, which employ distinct prediction strategies and gave consistent results (**Supplemental Experimental Procedures, Figures S1C, S1D and S2A-C, Tables S1B-D**). The conclusions are also independent of different criteria and cutoffs used to group the proteins, including the overall degree of disorder (**Supplemental Results S1 and Figure S3**), the average disorder scores both for the entire protein (**Figures S1C and S2A**) and for the disordered regions alone (**Figures S1D and S2B**), and the cutoffs used for detecting terminal and internal disordered segments (**Table S1E**) and different half-life groups (**Figures 1E, S1E and S1F**). Furthermore, outlier half-life values (**Supplemental Results S6**), protein length (**Supplemental Results S7, Figure S1G, Table S1G**), protein abundance (**Table S1H**), subcellular localization (cytoplasm versus nucleus, **Table S1I**), and the removal of membrane proteins, which may be degraded in a proteasome-independent manner (**Supplemental Results S8 and Table S1J**), did not affect the observed trends. The results are independent of known degradation signals (**Supplemental Results S2**) and uncharacterized sequence motifs that could facilitate degradation (**Supplemental Results S3**). An analysis of residues following the initiator methionine indicates that the nature of the N-terminal residue does not account for the global difference in half-life between proteins with long or short N-terminal disorder (**Supplemental Results S9 and Figure S1H**).

The observations on paralogs in yeast are similar if we do not consider paralogs that originated from the ancestral whole genome duplication (**Figure S4B**). Moreover, the results on paralogous pairs are robust in different kinds of permutation tests (**Table S6B and Supplemental Experimental Procedures**). We could not perform the paralog analysis in mouse or human because the mass spectrometry strategy used for measuring half-life is unable to differentiate between similar proteins with identical short peptide regions, such as paralogs and different splice forms (**Supplemental Experimental Procedures**). Finally, though the distributions in our analyses are broad and overlap, most differences are significant with both the Mann-Whitney  $U$  test and the Kolmogorov-Smirnov test (**Supplemental Experimental Procedures and Table S1K**), which are two distinct non-parametric statistical tests for evaluating whether two samples of observations come from the same distribution or not. Thus, the reported trends on protein half-life appear attributable to the presence and number of sufficiently long terminal and internal disordered segments.

#### **Results S6. Highly stable proteins with undetermined or outlier half-life are generally less disordered**

We discarded 366 proteins with a half-life of exactly 300 minutes, as the original paper (Belle et al., 2006) assigned this value to stable proteins for which degradation curves could not be fitted by an exponential decay function and thus half-life could not be determined. Moreover, to make sure that clear outliers would not affect the statistics, we removed seven



proteins with extremely long half-lives of >6000 minutes from the data.

To make sure that removal of these 373 proteins did not bias our analyses, we investigated the presence and length of disordered segments at various locations in these 'highly stable' proteins as well as their overall degree of disorder. We found that:

1. The removed, highly stable proteins contain significantly less disorder than the 3273 proteins in our main dataset: they tend to have shorter N-terminal disordered segments, less total internal disorder, and be more structured overall ( $P = 2 \times 10^{-2}$ ,  $P = 5 \times 10^{-8}$ ,  $P = 3 \times 10^{-6}$ , respectively, Mann-Whitney  $U$  tests, data not shown).
2. The discarded, stable proteins less often have a long (>30 residues) N-terminal disordered segment (51/373=13.7%) than proteins in our main dataset (479/3273=14.6%), although this difference is not statistically significant (odds ratio = 0.94;  $P = 0.7$ , chi-squared test).
3. There is a significant difference in the number of proteins that have a long internal disordered segment (94/373=25% of discarded proteins, 1260/3273=38% of included proteins; odds ratio = 0.66;  $P = 6 \times 10^{-7}$ , chi-squared test).
4. As mentioned in the main text, the experimental method for measuring protein half-lives involved C-terminal tagging with a TAP-tag (Belle et al., 2006). As a result, proteins with long and short C-terminal disordered segments display similar distributions of protein half-life (**Figure 1C**). The distribution of lengths of the disordered segments at the C-terminus as characterized from the original genome sequence is highly similar for proteins in our main dataset and for discarded highly stable proteins ( $P = 0.3$ , Mann-Whitney  $U$  tests, data not shown), which falls in line with the idea that the TAP-tag shields the contribution of the disordered segment at the C-terminus to half-life.

In short, the 373 highly stable proteins that we discarded in our main analyses generally contain shorter and less disordered segments, which, in line with the findings from our study, corresponds to them having long half-lives. Thus, removal of these highly stable proteins with long half-lives does not bias the results of our analyses, but rather strengthens our conclusions.

#### **Results S7. The results are independent of protein length**

Size is one of the determinants of the *in vivo* degradation rate of a protein, with large proteins being degraded more quickly than smaller ones (Dice et al., 1973). This observation has been confirmed by analyses of large-scale protein half-life data (Belle et al., 2006; Tompa et al., 2008). To ensure that our observations regarding the presence of disordered segments and protein half-life are not influenced by protein length, we classified the proteome into three groups of roughly equal size: (i) small proteins ( $\leq 350$  residues), (ii) medium size proteins (351-600 residues), and (iii) large proteins (>600 residues). Indeed, large proteins have a significantly shorter half-life than small proteins (**Figure S1G**). For each length group, we further divided the proteins into those that contain a long or short N-terminal disordered segment, a long or short C-terminal disordered segment, or an internal disordered segment. Where sample size is sufficient, we find that, regardless of protein size, the distribution of half-life values for proteins with long N-terminal disorder is significantly smaller than that of proteins with short N-terminal disorder (**Figure S1G** and **Table S1G**). There is generally no difference in half-life between proteins with long or short C-terminal disorder (**Figure S1G** and **Table S1G**). An exception to this appears to be the group of small proteins, although the number of small proteins with a long disordered C-terminus is small (92 cases). Finally, proteins that contain an internal disordered segment have a significantly shorter half-life, irrespective of their length (**Figure S1G** and **Table S1G**). These results suggest that our observations are independent of protein length.

#### **Results S8. Degradation of membrane proteins**

The majority of transmembrane proteins in eukaryotic cells are degraded in the lumen of lysosomes, independent of the proteasome (Piper and Katzmann, 2007; Raiborg and Stenmark, 2009). Ubiquitin functions as the signal that specifies which membrane proteins should be degraded. Following ubiquitination, endocytosis brings membrane proteins inside the cell into early endosomes. Subsequently, a variety of protein sorting machines, such as the endosomal sorting complex required for transport (ESCRT), sort the ubiquitin-flagged proteins to multivesicular endosomes (MVEs) or bodies (MVBs). These then fuse with a lysosome, where proteases in the acidic lumen digest the vesicles. It should be noted that proteasome-mediated degradation of membrane proteins does occur to some extent through the process of endoplasmic reticulum-associated degradation (ERAD) (Meusser et al., 2005; Vembar and Brodsky, 2008). However, this mechanism seems to apply mainly to damaged or misfolded membrane proteins and does not seem to be responsible for degradation of the majority.

To ensure that our observations regarding the effects of disordered segments on protein half-life do indeed apply to degradation by the proteasome, we performed control calculations on datasets that lack membrane proteins. We obtained a set of yeast membrane proteins from Österberg *et al.* (Österberg et al., 2006), subtracted these proteins (255) from our original dataset and redid the analysis. We find that the membrane proteins, which are degraded mainly in a proteasome-independent manner, do not influence our conclusions (**Table S1J**).

Even though the effects of disordered segments on protein half-life are primarily mediated through interaction with the proteasome, which is not the main route for degradation of transmembrane proteins, we were still interested to look into a potential connection between disordered regions in membrane proteins and their turnover rates. Therefore we asked: Do membrane proteins with long terminal or internal disordered segments in their cytosolic loops have shorter half-lives? To answer this question, we obtained information on membrane protein topology from Kim *et al.* (Kim *et al.*, 2006). In that study, the location of the C-terminus of multiple-spanning (two or more transmembrane helices) membrane proteins in yeast was determined using C-terminally tagged constructs. Cytosolic or extracellular location of the C-terminus was used to constrain topology predictions by TMHMM (Melen *et al.*, 2003). We inferred the disorder status of every residue in the predicted cytosolic loops and integrated this information with the half-life data (220 proteins in total). We then grouped proteins as in the original analyses: (i) by the length of the disordered termini if these are present on the cytosolic side (short,  $\leq 30$  residues; long,  $> 30$  residues), treating the N- and C-termini separately, and (ii) by the presence or absence of long internal disordered segments (at least 40 residues) in the cytosolic loops.

Membrane proteins with a cytosolic, long disordered N-terminus (27 in total) have a significantly shorter half-life compared to the group with no cytosolic N-terminus, or with a cytosolic, short disordered N-terminus ( $P = 7 \times 10^{-3}$ , Mann-Whitney *U* test, data not shown). Half-lives of membrane proteins with cytosol-localized long disordered segments at the C-terminus (which is tagged with a TAP-tag for the half-life measurements) are similar to half-lives of membrane proteins with no cytosolic C-terminus, or with a short disordered segment at the C-terminus ( $P = 0.3$ , Mann-Whitney *U* test, data not shown). These results are similar to the observed effects of terminal disordered segments on half-life for non-membrane proteins. However, proteins with one or more cytosol-localized long internal disordered segment (15 in total) have similar half-lives to proteins without such segments ( $P = 0.76$ , Mann-Whitney *U* test, data not shown). This is in contrast to the typically strongly decreased half-life of proteins with internal disordered segments for non-membrane proteins.

As discussed above, these results might be less biologically meaningful due to the established difference in mechanisms by which membranous and intracellular proteins are degraded. It should also be noted that the numbers of membrane proteins in each 'disorder' category are very small (27, 28 and 15), and much smaller than the numbers for non-membrane proteins. Furthermore, the disorder prediction algorithms that are the basis for calculating the presence of disordered segments have been developed for cytosolic proteins and are biased towards the amino acid composition of such proteins. Membrane proteins have different sequence compositions, which means that the confidence in the identified cytosolic disordered segments is lower. Thus far, no predictor has been developed specifically for identifying structural disorder in the loops of membrane proteins. Taking these points into account, the current observations could mean that membrane proteins with long terminal disordered regions might be more susceptible to degradation, though these effects are not seen for internal disordered segments.

### **Results S9. The relationship between N-terminal disorder and half-life does not appear connected to the N-end rule**

One mechanism regulating protein stability is the N-end rule, which links the identity of the N-terminal residue of a protein to its half-life. According to the N-end rule, a protein is stable if the exposed N-terminal residue is a small amino acid and unstable if it is large and bulky (Varshavsky, 2011). To establish whether the difference in half-life between proteins with long or short N-terminal disorder could be explained by differences in degradation dynamics due to the N-end rule, we compared the frequencies of amino acids in the second N-terminal residue (after removal of the initiator methionine by methionine aminopeptidases) in proteins with long or short disordered N-termini in yeast, mouse and human (**Figure S1H**). We also calculated the frequency of each amino acid in the second N-terminal residue for the entire proteomes.

In all analyzed organisms, the distributions of destabilizing amino acid frequencies (primary, secondary, or tertiary destabilizing, according to the N-end rule, see **Figure S1H**) are not significantly different between proteins with long N-terminal disordered segments and the entire proteomes ( $P = 0.2$  in yeast,  $P = 0.5$  in mouse,  $P = 0.1$  in human, chi-squared test). The same is true in yeast and mouse for the distributions of destabilizing amino acid frequencies between the groups of proteins with long or short N-terminal disorder ( $P = 0.1$  in yeast,  $P = 0.2$  in mouse, chi-squared test). In human, the distributions of destabilizing amino acid frequencies are different between proteins with long or short N-terminal disorder ( $P = 1 \times 10^{-2}$ ). It is not the case, however, that all types of destabilizing N-terminal amino acids are more common in human proteins with long N-terminal disordered regions, and thus account for their shorter half-life. In fact, several destabilizing residue types are more common in proteins with short N-terminal disorder (**Figure S1H**). These results indicate that the N-end rule does not account for the global differences in half-life among proteins with long or short N-terminal disorder.

It should be noted that this analysis makes the simplifying assumption that the initiator methionine is removed from all expressed proteins. The action of the N-terminal methionine amino-peptidase pathway, or the activity of proteases such as signal peptidases and caspases, removes the first methionine of most proteins or cleaves an internal recognition site

and exposes the amino-acid next to the methionine or any internal residue next to a cleavage site, respectively (Meinzel et al., 2006). Although a large fraction of the proteins in most proteomes are estimated to lose their N-terminal methionine, it is not clear which proteins are trimmed by exopeptidases after translation *in vivo*. Moreover, it is often unclear to what extent the N-terminus is trimmed. Recently, Lange and Overall assembled a database that includes results from several “terminomics” studies in which *in vivo* information about the actual protein N- and C- termini is collected (Lange and Overall, 2011). We used this database to find proteins for which there is experimental evidence for the removal of the first methionine residue. We then analyzed the distribution of amino acids at the N-terminus for these proteins with proven records for *in vivo* trimming. As before, we compared the groups of proteins with long or short N-terminal disordered segments for which protein half-life is available. Not enough proteins have proven records for *in vivo* methionine removal, have long N-terminal disordered segments, and have half-life information in yeast and human to get reliable results. However, amino acid frequency distributions could be calculated for mouse and statistical analysis revealed no significant difference between the frequencies of N-terminal amino acids after trimming between groups of proteins with long or short N-terminal disordered regions ( $P > 0.1$ , Wilcoxon signed-rank test). These results, combined with our analyses above (**Figure S1H**), indicate that the N-end rule is unlikely to account for the global differences in half-life of proteins with long or short N-terminal disorder.

# SUPPLEMENTAL DISCUSSION

## **Discussion S1. Proteins without disordered segments can still be degraded quickly**

Not only can proteins with long disordered segments still have a long half-life, proteins without disordered segments can still be degraded quickly (**Table 1C**). Several factors may target a protein more efficiently to the proteasome and thus shorten its half-life. For example, post-translational modifications such as phosphorylation, methylation, N-acetylation, and ubiquitination itself may destabilize or unfold protein regions (Hagai et al., 2011; Hagai and Levy, 2010; Hwang et al., 2010; Kim et al., 2014; Lee et al., 2012) or direct the activity of accessory factors that unfold substrates and present them to the proteasome as discussed in the main text for the p97/VCP ATPase (Beskow et al., 2009). Other factors that contribute to shorter half-life of individual or groups of proteins are the availability of ubiquitinating enzymes and sequence determinants (e.g. KEN box and destruction box motifs, N-end rule, PEST sequences)(Bachmair et al., 1986; Pflieger and Kirschner, 2000; Rogers et al., 1986). Nevertheless our observations suggest that, upon recruitment of a substrate to the proteasome, terminal or internal disordered segments influence protein half-life as an underlying factor and that this can be modulated by other cellular mechanisms, sequence determinants and the structural stability of the substrate.

## **Discussion S2. Disordered segments could influence the dynamics and regulation of signaling pathways (extended)**

Internal disordered segments in proteins can be cleaved by the proteasome to generate functionally active partial fragments that have crucial regulatory functions as demonstrated for the transcription factors NF- $\kappa$ B and Ci (Chen et al., 1999; Palombella et al., 1994; Piwko and Jentsch, 2006; Tian et al., 2005). If the protein functions in a homo- or a heteromeric complex, then the cleaved fragments can have important regulatory properties such as inducing a switch-like behavior by sequestering full-length proteins and acting in a dominant negative manner (Buchler and Louis, 2008). Furthermore, since the presence of a subunit containing disordered segments can target an entire protein complex for degradation (Prakash et al., 2009), variation in disordered segments of individual subunits may also influence the half-life of their interaction partners and that of the homo- or hetero-oligomeric complexes involving such proteins (Lin et al., 2000), thereby regulating the abundance of entire protein complexes.

Disordered segments could also be exploited to design signaling or transcription circuits composed of proteins with defined turnover rates, thereby generating networks with desired properties. For example, engineered kinases or transcription factors with a long terminal disordered segment may turn over rapidly and hence contribute to an ultra-sensitive or all-or-none response (Alon, 2007; Kiel et al., 2010).

# SUPPLEMENTAL EXPERIMENTAL PROCEDURES

## Yeast protein half-life data

Data on *in vivo* protein half-life for *Saccharomyces cerevisiae* was obtained from Belle *et al.* (Belle *et al.*, 2006), who measured protein turnover by Western blot analysis of TAP-tagged genes as a function of time following the inhibition of protein synthesis. We discarded 366 proteins with a half-life of exactly 300 minutes, as the original paper assigned this value to stable proteins for which degradation curves could not be fitted by an exponential decay function and thus half-life could not be determined. Moreover, to make sure that clear outliers would not affect the statistics, we removed seven proteins with extremely long half-lives of >6000 minutes from the data. Removal of these 373 highly stable proteins with long half-lives does not bias the results of our analyses (see **Supplemental Results S6**).

## Half-life groups

The yeast proteome was classified into three groups of roughly equal size based on half-life: (i) short-lived proteins (half-life  $\leq 30$  minutes), (ii) medium half-life proteins (half-life 31-70 minutes), and (iii) long-lived proteins (half-life >70 minutes). We analyzed the length of N- and C-terminal disorder within each group (**Figures 1E** and **S1E**). In order to assess the robustness of our results, we performed control calculations with variations on the half-life cutoffs: we grouped the proteome into two half-life groups, based on the median ( $\leq 42$  minutes, short half-life; >42 minutes, long half-life; **Figure S1F**).

## Disorder calculations and groups

All validated ORFs in the yeast genome were downloaded from UniProtKB/Swiss-Prot release 2010\_11 (UniProt Consortium, 2011). Intrinsic disorder was predicted for all protein sequences using the DISOPRED2 (Ward *et al.*, 2004) software, with default settings. DISOPRED2 is a support vector machine-based classifier, trained on missing electron density in solved crystal structures, which performs well in CASP assessments (Bordoli *et al.*, 2007; Noivirt-Brik *et al.*, 2009). Based on the predicted disorder, we calculated several properties relating to the length and location of disordered segments in the protein sequences. We then used this information to divide the yeast proteome into different groups:

### (a) *The length of the disordered segment at the protein N- and C-terminus*

We counted the number of residues predicted to be disordered at the protein termini, treating the N- and C-termini separately. For this, we allowed for minor (up to three consecutive residues) stretches of structured residues. This means that we considered a disordered region ended when encountering a stretch of minimally four structured residues. Thus, continuous stretches of three or less structured residues were regarded as belonging to the disordered terminus and included in the calculation of the length of the disordered terminus (except when they were the start of stretches of four or more structured residues that would end the disordered region). Depending on the length of the disordered terminus, we classified the proteins into two groups: (i) those that have short ( $\leq 30$  residues) and (ii) those that have long (>30 residues) disordered termini (**Figure 1**). We based the cutoff for long and short disordered termini on recent molecular models of the proteasome (da Fonseca *et al.*, 2012; Lander *et al.*, 2012; Lasker *et al.*, 2012; Matyskiela *et al.*, 2013; Sledz *et al.*, 2013), and *in vitro* experimental studies using purified proteasomes showing that there is a critical minimum length of about 30 residues that allows a disordered protein terminus to efficiently initiate degradation (Inobe *et al.*, 2011). In order to assess the robustness of our results, we performed control calculations with variations on the length cutoff (**Table S1E**).

### (b) *The presence of an internal disordered segment*

The proteolytic sites are buried deep within the proteasome core particle, accessible only through a long narrow channel, and the same is true for the ATPase motor that drives protein substrates through the degradation channel (da Fonseca *et al.*, 2012; Lander *et al.*, 2012; Lasker *et al.*, 2012; Matyskiela *et al.*, 2013; Sledz *et al.*, 2013). To investigate if the presence of internal disordered regions in a protein influences its half-life, we identified internal disordered segments as continuous stretches of at least 40 disordered amino acids in the middle of a protein (see main text). As for terminal disordered regions, we allowed for minor stretches of up to three structured residues in-between the disordered residues (see above). We discarded any N- and C-terminal disordered segments as defined above from the calculation of internal disordered segments. According to these definitions, we grouped the yeast proteome into two groups: (i) proteins that contained internal stretches of intrinsic disorder of at least 40 residues, and (ii) proteins that did not (**Figure 2**). In order to assess the robustness of our results, we performed control calculations with variations on the length cutoff (**Table S1E**). Systematically varying the length cutoff for identifying an internal intrinsically disordered segment revealed that maximal difference in median half-life and statistical significance was obtained for a value of 40 amino acids. We also investigated the half-lives of proteins with multiple internal disordered regions (**Figures 2C** and **S2C**).

### (c) *The overall degree of disorder*

The fraction of disordered residues (i.e. overall degree of disorder), which is an estimate of the packing, folding and structural stability of a protein, by itself correlates with protein half-life, although previous studies disagree on the extent of the effect (Gspöner *et al.*, 2008; Tompa *et al.*, 2008; Yen *et al.*, 2008). Proteins with a greater overall disorder degree contain longer terminal and internal disordered segments (**Figure S3A**). To determine whether the effects of continuous

stretches of disordered residues (i.e. disordered segments) on protein turnover (**Figures 1 and 2**) are independent of the overall degree of disorder, we calculated disorder degree as the fraction of residues in the protein that was predicted to be disordered (number of disordered residues divided by sequence length). We then matched proteins that have a similar fraction of disordered residues but have varying combinations of disordered segments (long or short N-terminal disorder and/or presence or absence of internal disordered segments). The results are shown in **Figure S3** and are reported in the main text (section “The effects of disordered segments on protein half-life are independent of the overall disorder degree”), and in an extended section in **Supplemental Results S1**. We also made classifications based on the scores reported by the disorder predictors, both for the average score of the entire protein (**Figures S1C and S2A**) and of the disordered regions alone (**Figures S1D and S2B**).

Unless otherwise noted, the disorder predictor used in our analyses is DISOPRED2. To ensure that our results are independent of the method used for intrinsic disorder prediction, we repeated the same calculations using disorder information from the IUPred (Dosztanyi et al., 2005) and PONDR VSL1 (Obradovic et al., 2005) predictors (**Figures S1C-D and S2A-C, Tables S1B-D**). IUPred was run in ‘long’ disorder prediction mode, and the disorder thresholds were adjusted to a score of 0.4 for IUPred and 0.6 for PONDR. These thresholds were chosen to maximize agreement with the average level of disorder observed in the DISPROT database release 5.7 (Sickmeier et al., 2007). We chose to complement our DISOPRED2 calculations with IUPred and PONDR because the three methods are very different, and are therefore likely to provide good control data. DISOPRED2 is a support vector machine-based classifier, trained on missing electron density in solved crystal structures, while IUPred is a sequence-based method that estimates inter-residue interactions. Sequences with less favorable predicted pairwise interaction energies are more likely to be disordered, due to a lack of stabilizing contacts. The third predictor, PONDR VSL1, employs logistic regression models of various sequence attributes, and is trained on missing electron density in crystal structures and disordered regions identified by other means. Consistently, we get very similar results with the three different disorder predictors (**Figures S1C-D and S2A-C, Tables S1B-D**).

#### Data integration and description

Integration of the data on yeast protein half-life, and various other datasets (**Table S1A**), with the length and location of intrinsic disorder within the protein sequences resulted in a dataset of 3273 proteins. This covers about two-thirds of the complete yeast proteome (Christie et al., 2004). The data for our DISOPRED2-based analyses is available in **Table S2**.

The distribution of half-life values is approximately log-normal (**Figure S1A**) with an enrichment for proteins with a very fast turnover rate of 2 and 3 minutes, as was also noted by Belle *et al.* (Belle et al., 2006). The half-lives have a mean of 98 minutes and a median of 43 minutes. N- and C-terminal disorder length distributions are similar to each other (**Figure S1A**): there are a large number of proteins with very short terminal disorder, and much fewer proteins with very long terminal disorder. The means for N- and C-terminal disorder length are 19 and 13 residues, respectively. The medians are 8 and 3 residues. In both datasets the frequency of encountering a terminal disordered segment of a certain length decreases rapidly with increasing length. Linear regression analysis of the two distributions plotted in log-log fashion showed a reasonable fit (N-terminal:  $R^2 = 0.86$ ; C-terminal:  $R^2 = 0.84$ , data not shown), which could suggest a power law distribution (Stumpf and Porter, 2012). Larger lengths are observed for internal disordered segments (**Figure S1A**): the mean length of an internal disordered segment is 24 residues, while the median length is 14 residues. The shape of the distribution is similar to the terminal disorder types, and linear regression analysis of a log-log plot also shows a reasonable fit ( $R^2 = 0.87$ , data not shown).

#### Statistical methods and estimation of significance

All analyses and statistics employed in our study were selected to be highly robust. As discussed above, most datasets are not normally distributed (**Figure S1A**). Therefore we exclusively employed statistical tests that do not assume the data to come from a specific type of probability distribution and do not infer parameters of such distributions (such as the mean and variance for Gaussian distributions), i.e. we exclusively employed non-parametric statistics for estimating statistical significance (Mann-Whitney  $U$ , Wilcoxon Signed-Rank, Kruskal-Wallis, and Kolmogorov-Smirnov tests). Although parametric statistics generally have more power, which means that they have a smaller chance to commit a type II error (failure to reject a false null hypothesis), they commonly assume normally distributed data and violations of these and other assumptions can lead to misleading results. In contrast, non-parametric statistics rely on few assumptions about the data and, given that our data is not normally distributed, these are more robust than parametric statistics.

We primarily use the Mann-Whitney  $U$  test to compare half-life distributions of different groups of proteins and to estimate significance (but reach the same conclusions using the Kolmogorov-Smirnov test, **Table S1K**). The Mann-Whitney  $U$  test, also known as the Wilcoxon Rank-Sum test, evaluates whether two samples are likely to come from the same underlying distribution ( $H_0$ ), and can be used to assess whether the medians of two distributions are significantly different. The Mann-Whitney  $U$  test assumes that the compared distributions have similar shapes, which is fair for our data, because the groups that we compare are always subsets of the whole data and have very similar overall shapes as demonstrated by the various boxplots throughout the paper. Boxplots are non-parametric visualizations for gaining insights into various properties of the distribution, such as the median, interquartile range, minimum and maximum, outliers, and skewness. The Kolmogorov-Smirnov test also evaluates whether two samples of observations come from

the same distribution or not, and does so by determining the maximum vertical deviation between the empirical distribution functions of the two samples. The Kruskal-Wallis test extends the Mann-Whitney  $U$  test to three or more sample groups. When comparing half-life distributions of proteins paired by overall disorder degree,  $P$  values were calculated using the Wilcoxon Signed-Rank test, which is a non-parametric test for assessing difference between two paired samples.

Throughout our analyses, we report medians and interquartile ranges, which are robust measures of central tendency and dispersion, rather than means and standard deviations, which are sensitive to outliers and less resistant to errors produced by deviations from assumptions. Furthermore, we not only report  $P$  values of statistical differences between distributions, but also show that the magnitudes of the differences (effect sizes, which we report as the difference between the medians of the compared distributions) are of a biologically relevant order of magnitude.

Our primary analyses rely on binning and cutoffs for the data describing structural disorder, rather than for example on linear regression and correlation analyses, because this approach best captures the biology of protein degradation influenced by disordered segments: half-life does not depend linearly on the length of the disordered segment, which becomes only relevant from a minimal value (see main text and **Figure S1B**). Thus, we do not presume the existence of a linear relationship, but simply investigate whether the group of proteins with disordered segments has a different half-life when compared to the group without disordered segments by binning proteins into groups based on the critical cutoff found in biochemical studies. Grouping of data points into classes and assessing the difference between the distributions is a powerful way to identify the existence of a relationship without assuming any underlying model of correlation.

Even if one assumes a linear relationship, calculation of the best linear fit for a large number of experimentally determined data points is unlikely to yield high correlation values. Indeed, although the length of disordered segments at various positions in proteins negatively correlates with half-life, the  $r$  values are of a very small magnitude (Pearson  $r = -0.02$  for the correlation between the length of N-terminal disorder and protein half-life,  $r = -0.01$  for C-terminal disorder, and  $r = -0.05$  for the longest internal disordered segment, **Figure S1B**). Only the correlation between internal disorder length and protein half-life is statistically significant ( $P = 3 \times 10^{-3}$ ). These results agree with our reported observations suggesting an inverse relationship between the presence of disordered segments and protein half-life, but, more importantly, underscore that correlation analyses and assumptions about a linear relationship are insufficient to capture the biology of protein degradation influenced by disordered segments.

Plots of the data and all statistical tests to estimate significance were carried out using the R statistical package (R Development Core Team).

### Paralog calculations

A complete list of paralogous proteins in yeast was obtained in two steps:

1. First, we ran the program BLASTClust (Altschul et al., 1990) on the *S. cerevisiae* proteome. BLASTClust works by performing pairwise sequence comparisons among all yeast proteins and subsequently grouping the proteins by single-linkage clustering. It accepts various parameters affecting the stringency of clustering – in this study, sequences were registered as a pairwise match when they are at least 25% identical (parameter S) over an area covering 60% of the length (parameter L). This ensured, on the one hand, that pairs are sufficiently similar to reduce the number of false-positive paralog pairs and, on the other hand, that the genes could have diverged enough to allow for their half-lives and/or disordered regions to change. The heuristic list of paralogs was obtained by forming all possible pairs within each cluster.
2. In order to include more divergent paralogs that were not picked up by the procedure in step 1, we added to the list all known paralog pairs that resulted from the whole genome duplication in yeast (Wolfe and Shields, 1997). This additional data was obtained from the Yeast Gene Order Browser (<http://wolfe.gen.tcd.ie/ygob/>) Version 3 (Gordon et al., 2009).

**Table S7** shows all 1440 pairs for which protein half-life data is available for both paralogs. To calculate the differences in half-life  $\Delta H$  and N-terminal disorder length  $\Delta L$  between the individual proteins in a paralog pair, the following convention is made:  $\Delta L$  is defined to be always positive (**Figure 4**). In other words, we define “paralog 1” to be the paralog with the longer N-terminal disorder and “paralog 2” the protein with the shorter N-terminal disorder of the paralog pair.  $\Delta L$  is then obtained by subtracting the N-terminal disorder length of paralog 2 from the N-terminal disorder length of paralog 1 ( $\Delta L = L_1 - L_2$ , with  $L_1 \geq L_2$ ). To calculate  $\Delta H$ , the order of paralogs in a pair is maintained, so that  $\Delta H$  can be positive or negative ( $\Delta H = H_1 - H_2$ ). Thus,  $\Delta H$  is negative whenever the relationship “longer disordered N-terminus = shorter half-life” holds true. We separated the paralog pairs into two groups according to the difference in the length of their N-terminal disordered segments: pairs where one paralog has a short and the other paralog a long disordered N-terminus, and pairs where both paralogs have short or both have long disordered N-termini. Similarly, for internal disorder, we define the difference in the number of internal disordered regions ( $\Delta I$ ) to be always positive ( $\Delta I = I_1 - I_2$ , with  $I_1 \geq I_2$ ). We separated the paralog pairs into two categories: pairs with an identical number of sites ( $\Delta I = 0$ ), and pairs where one paralog has one or more sites more than the other ( $\Delta I \geq 1$ ). Since the  $\Delta I = 0$  pairs cannot be arranged based on the number of internal disordered segments (i.e.  $I_1 = I_2$  and thus  $I_1 > I_2$  is never true), we ordered the members of

such pairs by the total number of residues that make up all internal disordered segments (internal disorder length, IL) in these proteins (analogous to N-terminal disorder length ordering used above). We did this twice to simulate two different evolutionary scenarios: once we subtracted the half-life of the paralog with the longest total internal disorder from the half-life of the paralog with the shorter total internal disorder (length of internal disorder increased during evolution), and once the other way around (length of internal disorder decreased during evolution). Thus, for each  $\Delta I = 0$  pair, we once calculate  $\Delta H$  as  $H_1 - H_2$  where  $IL_1 \geq IL_2$ , and once as  $H_1 - H_2$  where  $IL_1 \leq IL_2$

We calculated the half-life and N-terminal disorder length differences for several randomized controls to ensure that the trend observed in the paralog pair analysis is not merely a product of chance. Specifically, we randomized (i) the disordered N-terminus length, (ii) the protein half-life and (iii) both values among all proteins (**Table S6B**). Thus, the overall distribution of values remains intact during the randomization, while the individual assignment to paralog pair groups may change. To make sure that the observed effect is paralog pair specific we also generated a random set of protein pairs from the singletons (clusters of size 1, corresponding to proteins that lack a paralog) in the BLASTClust analysis (**Table S6B**).

### Mouse and human data

To assess the effects of terminal and internal disordered segments on protein half-life in other organisms than yeast, we performed the same analyses with mouse protein half-life data and human relative degradation rates, with the exception of the paralogs analysis (see section “The experimental design used to measure protein half-life in mouse and human does not permit a confident investigation of half-life differences among paralogous proteins”, below). Reviewed protein sequences for mouse and human were downloaded from UniProtKB/Swiss-Prot release 2011\_4 (Uniprot-Consortium, 2011). Data on half-life for ~4500 proteins in NIH3T3 mouse fibroblasts was obtained from Schwanhäusser *et al.* (Schwanhäusser *et al.*, 2011). Data on relative degradation rates for ~4000 proteins in human THP-1 myelomonocytic leukemia cells, under conditions that stimulate proliferation, was obtained from Kristensen *et al.* (Kristensen *et al.*, 2013). Both studies make use of stable isotope labeling by amino acids in cell culture (SILAC) in combination with mass spectrometry. Upon transferring cells from light to heavy medium, newly synthesized proteins incorporate heavy labeled amino acids, while the pre-existing proteins remain in the light from. Protein half-lives and degradation rates were derived from the ratio between the heavy and light peptides, measured using mass spectrometry at different time points after the transfer of cells to heavy medium.

### The experimental design used to measure protein half-life in mouse and human does not permit a confident investigation of half-life differences among paralogous proteins

Protein turnover in mouse (Schwanhäusser *et al.*, 2011) and human (Kristensen *et al.*, 2013) has been measured using stable isotope labeling by amino acids in cell culture (SILAC) in combination with mass spectrometry. Upon transferring cells from light to heavy medium, newly synthesized proteins incorporate heavy labeled amino acids, while the pre-existing proteins remain in the light from. Protein half-lives and degradation rates were derived from the ratio between the heavy and light peptides, measured using mass spectrometry at different time points after the transfer of cells to heavy medium.

Peptides that are detected using mass spectrometry need to be assigned to proteins. In most cases, unique peptides can be mapped to proteins with reasonable confidence. However, some proteins give rise to identical peptides, in which case it becomes hard to determine which protein the peptides originated from (Li *et al.*, 2009; Nesvizhskii and Aebersold, 2005). Most methods for assigning MS peptides to proteins require that multiple, distinct peptides are present in order for a protein to be identified. Nevertheless, when proteins are very similar, problems arise, as they may not give rise to enough unique peptides to reliably quantify similar proteins. Since paralogous proteins are similar to each other by definition, and have in some cases hardly diverged during evolution, such sequences can be hard or impossible to differentiate using mass spectrometry. Similarly, proteins arising from alternative splicing or alternative initiation during transcription or translation are difficult to characterize. Thus, the current limitation of mass spectrometry to reliably distinguish peptides arising from proteins with similar sequences restricts us from performing an analysis of half-life differences among paralogous proteins in mouse and human.

### Protein structures

The model of the 26S proteasome (**Figure 5**) is based on the electron microscopy density map from (Lander *et al.*, 2012) (EMDataBank ID: 1992). The figure was prepared using the UCSF Chimera package (Pettersen *et al.*, 2004). Protein structure figures of Cytochrome C oxidase (PDB ID: 1U96 (Abajian *et al.*, 2004)) and Triosephosphate isomerase (PDB ID: 1YPI (Lolis *et al.*, 1990)) (**Figure 1A**) were prepared using YASARA (Krieger *et al.*, 2002). Distance measurements on the crystal structure of the 20S yeast proteasome (PDB ID: 1RYP (Groll *et al.*, 1997)) were done using the PyMOL Molecular Graphics System, Version 1.3 (Schrodinger, 2010) (**Figure S2D**).



## SUPPLEMENTAL REFERENCES

- Abajian, C., Yatsunyk, L.A., Ramirez, B.E., and Rosenzweig, A.C. (2004). Yeast cox17 solution structure and Copper(I) binding. *J. Biol. Chem.* *279*, 53584-53592.
- Alon, U. (2007). Network motifs: theory and experimental approaches. *Nat. Rev. Genet.* *8*, 450-461.
- Altschul, S.F., Gish, W., Miller, W., Myers, E.W., and Lipman, D.J. (1990). Basic local alignment search tool. *J. Mol. Biol.* *215*, 403-410.
- Bachmair, A., Finley, D., and Varshavsky, A. (1986). In vivo half-life of a protein is a function of its amino-terminal residue. *Science* *234*, 179-186.
- Belle, A., Tanay, A., Bitincka, L., Shamir, R., and O'Shea, E.K. (2006). Quantification of protein half-lives in the budding yeast proteome. *Proc. Natl. Acad. Sci. USA* *103*, 13004-13009.
- Beskow, A., Grimberg, K.B., Bott, L.C., Salomons, F.A., Dantuma, N.P., and Young, P. (2009). A conserved unfoldase activity for the p97 AAA-ATPase in proteasomal degradation. *J. Mol. Biol.* *394*, 732-746.
- Bordoli, L., Kiefer, F., and Schwede, T. (2007). Assessment of disorder predictions in CASP7. *Proteins* *69 Suppl 8*, 129-136.
- Buchler, N.E., and Louis, M. (2008). Molecular titration and ultrasensitivity in regulatory networks. *J. Mol. Biol.* *384*, 1106-1119.
- Chen, C.H., von Kessler, D.P., Park, W., Wang, B., Ma, Y., and Beachy, P.A. (1999). Nuclear trafficking of Cubitus interruptus in the transcriptional regulation of Hedgehog target gene expression. *Cell* *98*, 305-316.
- Christie, K.R., Weng, S., Balakrishnan, R., Costanzo, M.C., Dolinski, K., Dwight, S.S., Engel, S.R., Feierbach, B., Fisk, D.G., Hirschman, J.E., *et al.* (2004). Saccharomyces Genome Database (SGD) provides tools to identify and analyze sequences from Saccharomyces cerevisiae and related sequences from other organisms. *Nucleic Acids Res.* *32*, D311-314.
- da Fonseca, P.C., He, J., and Morris, E.P. (2012). Molecular model of the human 26S proteasome. *Mol. Cell* *46*, 54-66.
- Davey, N.E., Haslam, N.J., Shields, D.C., and Edwards, R.J. (2010). SLiMFinder: a web server to find novel, significantly over-represented, short protein motifs. *Nucleic Acids Res.* *38*, W534-539.
- Davey, N.E., Van Roey, K., Weatheritt, R.J., Toedt, G., Uyar, B., Altenberg, B., Budd, A., Diella, F., Dinkel, H., and Gibson, T.J. (2012). Attributes of short linear motifs. *Mol. Biosyst.* *8*, 268-281.
- Dice, J.F., Dehlinger, P.J., and Schimke, R.T. (1973). Studies on the correlation between size and relative degradation rate of soluble proteins. *J. Biol. Chem.* *248*, 4220-4228.
- Dinkel, H., Michael, S., Weatheritt, R.J., Davey, N.E., Van Roey, K., Altenberg, B., Toedt, G., Uyar, B., Seiler, M., Budd, A., *et al.* (2012). ELM--the database of eukaryotic linear motifs. *Nucleic Acids Res.* *40*, D242-251.
- Dosztanyi, Z., Csizmok, V., Tompa, P., and Simon, I. (2005). The pairwise energy content estimated from amino acid composition discriminates between folded and intrinsically unstructured proteins. *J. Mol. Biol.* *347*, 827-839.
- Gordon, J.L., Byrne, K.P., and Wolfe, K.H. (2009). Additions, losses, and rearrangements on the evolutionary route from a reconstructed ancestor to the modern Saccharomyces cerevisiae genome. *PLoS Genet.* *5*, e1000485.
- Groll, M., Ditzel, L., Lowe, J., Stock, D., Bochtler, M., Bartunik, H.D., and Huber, R. (1997). Structure of 20S proteasome from yeast at 2.4 Å resolution. *Nature* *386*, 463-471.
- Gsponer, J., Futschik, M.E., Teichmann, S.A., and Babu, M.M. (2008). Tight regulation of unstructured proteins: from transcript synthesis to protein degradation. *Science* *322*, 1365-1368.
- Hagai, T., Azia, A., Toth-Petroczy, A., and Levy, Y. (2011). Intrinsic disorder in ubiquitination substrates. *J. Mol. Biol.* *412*, 319-324.

- Hagai, T., and Levy, Y. (2010). Ubiquitin not only serves as a tag but also assists degradation by inducing protein unfolding. *Proc. Natl. Acad. Sci. USA* *107*, 2001-2006.
- Huang da, W., Sherman, B.T., and Lempicki, R.A. (2009a). Bioinformatics enrichment tools: paths toward the comprehensive functional analysis of large gene lists. *Nucleic Acids Res.* *37*, 1-13.
- Huang da, W., Sherman, B.T., and Lempicki, R.A. (2009b). Systematic and integrative analysis of large gene lists using DAVID bioinformatics resources. *Nat. Protoc.* *4*, 44-57.
- Hwang, C.S., Shemorry, A., and Varshavsky, A. (2010). N-terminal acetylation of cellular proteins creates specific degradation signals. *Science* *327*, 973-977.
- Inobe, T., Fishbain, S., Prakash, S., and Matouschek, A. (2011). Defining the geometry of the two-component proteasome degron. *Nat. Chem. Biol.* *7*, 161-167.
- Jorda, J., Xue, B., Uversky, V.N., and Kajava, A.V. (2010). Protein tandem repeats - the more perfect, the less structured. *FEBS J.* *277*, 2673-2682.
- Kiel, C., Yus, E., and Serrano, L. (2010). Engineering signal transduction pathways. *Cell* *140*, 33-47.
- Kim, H., Melen, K., Osterberg, M., and von Heijne, G. (2006). A global topology map of the *Saccharomyces cerevisiae* membrane proteome. *Proc. Natl. Acad. Sci. USA* *103*, 11142-11147.
- Kim, H.K., Kim, R.R., Oh, J.H., Cho, H., Varshavsky, A., and Hwang, C.S. (2014). The N-terminal methionine of cellular proteins as a degradation signal. *Cell* *156*, 158-169.
- Krieger, E., Koraimann, G., and Vriend, G. (2002). Increasing the precision of comparative models with YASARA NOVA--a self-parameterizing force field. *Proteins* *47*, 393-402.
- Kristensen, A.R., Gsponer, J., and Foster, L.J. (2013). Protein synthesis rate is the predominant regulator of protein expression during differentiation. *Mol. Syst. Biol.* *9*, 689.
- Lander, G.C., Estrin, E., Matyskiela, M.E., Bashore, C., Nogales, E., and Martin, A. (2012). Complete subunit architecture of the proteasome regulatory particle. *Nature* *482*, 186-191.
- Lange, P.F., and Overall, C.M. (2011). TopFIND, a knowledgebase linking protein termini with function. *Nat. Methods* *8*, 703-704.
- Lasker, K., Forster, F., Bohn, S., Walzthoeni, T., Villa, E., Unverdorben, P., Beck, F., Aebersold, R., Sali, A., and Baumeister, W. (2012). Molecular architecture of the 26S proteasome holocomplex determined by an integrative approach. *Proc. Natl. Acad. Sci. USA* *109*, 1380-1387.
- Lee, J.M., Lee, J.S., Kim, H., Kim, K., Park, H., Kim, J.Y., Lee, S.H., Kim, I.S., Kim, J., Lee, M., *et al.* (2012). EZH2 generates a methyl degron that is recognized by the DCAF1/DDB1/CUL4 E3 ubiquitin ligase complex. *Mol. Cell* *48*, 572-586.
- Li, Y.F., Arnold, R.J., Li, Y., Radivojac, P., Sheng, Q., and Tang, H. (2009). A bayesian approach to protein inference problem in shotgun proteomics. *J. Comput. Biol.* *16*, 1183-1193.
- Lin, L., DeMartino, G.N., and Greene, W.C. (2000). Cotranslational dimerization of the Rel homology domain of NF-kappaB1 generates p50-p105 heterodimers and is required for effective p50 production. *EMBO J.* *19*, 4712-4722.
- Liu, Z., Yuan, F., Ren, J., Cao, J., Zhou, Y., Yang, Q., and Xue, Y. (2012). GPS-ARM: computational analysis of the APC/C recognition motif by predicting D-boxes and KEN-boxes. *PLoS One* *7*, e34370.
- Lolis, E., Alber, T., Davenport, R.C., Rose, D., Hartman, F.C., and Petsko, G.A. (1990). Structure of yeast triosephosphate isomerase at 1.9-A resolution. *Biochemistry* *29*, 6609-6618.
- Matyskiela, M.E., Lander, G.C., and Martin, A. (2013). Conformational switching of the 26S proteasome enables substrate degradation. *Nat. Struct. Mol. Biol.* *20*, 781-788.
- Meinzel, T., Serero, A., and Giglione, C. (2006). Impact of the N-terminal amino acid on targeted protein degradation.

Biol. Chem. 387, 839-851.

Melen, K., Krogh, A., and von Heijne, G. (2003). Reliability measures for membrane protein topology prediction algorithms. *J. Mol. Biol.* 327, 735-744.

Meusser, B., Hirsch, C., Jarosch, E., and Sommer, T. (2005). ERAD: the long road to destruction. *Nat. Cell Biol.* 7, 766-772.

Neduva, V., Linding, R., Su-Angrand, I., Stark, A., de Masi, F., Gibson, T.J., Lewis, J., Serrano, L., and Russell, R.B. (2005). Systematic discovery of new recognition peptides mediating protein interaction networks. *PLoS Biol.* 3, e405.

Nesvizhskii, A.I., and Aebersold, R. (2005). Interpretation of shotgun proteomic data: the protein inference problem. *Mol. Cell. Proteomics* 4, 1419-1440.

Newman, J.R., Ghaemmaghami, S., Ihmels, J., Breslow, D.K., Noble, M., DeRisi, J.L., and Weissman, J.S. (2006). Single-cell proteomic analysis of *S. cerevisiae* reveals the architecture of biological noise. *Nature* 441, 840-846.

Noivirt-Brik, O., Prilusky, J., and Sussman, J.L. (2009). Assessment of disorder predictions in CASP8. *Proteins 77 Suppl 9*, 210-216.

Obradovic, Z., Peng, K., Vucetic, S., Radivojac, P., and Dunker, A.K. (2005). Exploiting heterogeneous sequence properties improves prediction of protein disorder. *Proteins 61 Suppl 7*, 176-182.

Osterberg, M., Kim, H., Warringer, J., Melen, K., Blomberg, A., and von Heijne, G. (2006). Phenotypic effects of membrane protein overexpression in *Saccharomyces cerevisiae*. *Proc. Natl. Acad. Sci. USA* 103, 11148-11153.

Palombella, V.J., Rando, O.J., Goldberg, A.L., and Maniatis, T. (1994). The ubiquitin-proteasome pathway is required for processing the NF-kappa B1 precursor protein and the activation of NF-kappa B. *Cell* 78, 773-785.

Pettersen, E.F., Goddard, T.D., Huang, C.C., Couch, G.S., Greenblatt, D.M., Meng, E.C., and Ferrin, T.E. (2004). UCSF Chimera--a visualization system for exploratory research and analysis. *J. Comput. Chem.* 25, 1605-1612.

Pfleger, C.M., and Kirschner, M.W. (2000). The KEN box: an APC recognition signal distinct from the D box targeted by Cdh1. *Genes Dev.* 14, 655-665.

Piper, R.C., and Katzmann, D.J. (2007). Biogenesis and function of multivesicular bodies. *Annu. Rev. Cell. Dev. Biol.* 23, 519-547.

Piwko, W., and Jentsch, S. (2006). Proteasome-mediated protein processing by bidirectional degradation initiated from an internal site. *Nat. Struct. Mol. Biol.* 13, 691-697.

Prakash, S., Inobe, T., Hatch, A.J., and Matouschek, A. (2009). Substrate selection by the proteasome during degradation of protein complexes. *Nat. Chem. Biol.* 5, 29-36.

R Development Core Team. R: A language and environment for statistical computing (Vienna, Austria: R Foundation for Statistical Computing).

Raiborg, C., and Stenmark, H. (2009). The ESCRT machinery in endosomal sorting of ubiquitylated membrane proteins. *Nature* 458, 445-452.

Rice, P., Longden, I., and Bleasby, A. (2000). EMBOSS: the European Molecular Biology Open Software Suite. *Trends Genet.* 16, 276-277.

Rogers, S., Wells, R., and Rechsteiner, M. (1986). Amino acid sequences common to rapidly degraded proteins: the PEST hypothesis. *Science* 234, 364-368.

Romero, P., Obradovic, Z., Li, X., Garner, E.C., Brown, C.J., and Dunker, A.K. (2001). Sequence complexity of disordered protein. *Proteins* 42, 38-48.

Schrodinger, LLC (2010). The PyMOL Molecular Graphics System, Version 1.3r1.

Schwanhauser, B., Busse, D., Li, N., Dittmar, G., Schuchhardt, J., Wolf, J., Chen, W., and Selbach, M. (2011). Global

quantification of mammalian gene expression control. *Nature* 473, 337-342.

Sickmeier, M., Hamilton, J.A., LeGall, T., Vacic, V., Cortese, M.S., Tantos, A., Szabo, B., Tompa, P., Chen, J., Uversky, V.N., *et al.* (2007). DisProt: the Database of Disordered Proteins. *Nucleic Acids Res.* 35, D786-793.

Simon, M., and Hancock, J.M. (2009). Tandem and cryptic amino acid repeats accumulate in disordered regions of proteins. *Genome Biol.* 10, R59.

Sledz, P., Unverdorben, P., Beck, F., Pfeifer, G., Schweitzer, A., Forster, F., and Baumeister, W. (2013). Structure of the 26S proteasome with ATP-gammaS bound provides insights into the mechanism of nucleotide-dependent substrate translocation. *Proc. Natl. Acad. Sci. USA* 110, 7264-7269.

Stumpf, M.P., and Porter, M.A. (2012). Mathematics. Critical truths about power laws. *Science* 335, 665-666.

Tian, L., Holmgren, R.A., and Matouschek, A. (2005). A conserved processing mechanism regulates the activity of transcription factors Cubitus interruptus and NF-kappaB. *Nat. Struct. Mol. Biol.* 12, 1045-1053.

Tompa, P., Prilusky, J., Silman, I., and Sussman, J.L. (2008). Structural disorder serves as a weak signal for intracellular protein degradation. *Proteins* 71, 903-909.

UniProt-Consortium (2011). Ongoing and future developments at the Universal Protein Resource. *Nucleic Acids Res.* 39, D214-219.

Varshavsky, A. (2011). The N-end rule pathway and regulation by proteolysis. *Protein Sci.* 20, 1298-1345.

Vembar, S.S., and Brodsky, J.L. (2008). One step at a time: endoplasmic reticulum-associated degradation. *Nat. Rev. Mol. Cell Biol.* 9, 944-957.

Ward, J.J., Sodhi, J.S., McGuffin, L.J., Buxton, B.F., and Jones, D.T. (2004). Prediction and functional analysis of native disorder in proteins from the three kingdoms of life. *J. Mol. Biol.* 337, 635-645.

Wolfe, K.H., and Shields, D.C. (1997). Molecular evidence for an ancient duplication of the entire yeast genome. *Nature* 387, 708-713.

Yen, H.C., Xu, Q., Chou, D.M., Zhao, Z., and Elledge, S.J. (2008). Global protein stability profiling in mammalian cells. *Science* 322, 918-923.
